# Supplementary material for: Cold-water coral mounds are effective carbon sinks in the western Mediterranean Sea
Source: Copernicus journal article supplement (doi:10.5194/egusphere-2024-2532), 2024-10-02
Supplement: Supplementary file 1 [file egusphere-2024-2532-supplement.pdf]

# Supplementary Material

## S1 Calibration of GeoB18116-2 Dry Bulk Density (DBD) from CT scan data and pycnometer density measurements

CT analysis can be utilized reliably for sediment core density analyses (*sensu* Orsi *et al.*, 1994; Gerland and Villinger, 1995) with the advantage of much higher resolution, non-invasive sampling and substantial reduction of lab work. This is based on a general link between the density of an object and the attenuation of x-rays by the object (Orsi and Anderson, 1999; Duchesne *et al.*, 2009).

Upon comparing the Pycnometer-based classical density measurements of GeoB18116-2 with the 5 cm-average values from the CT on “Mean x-ray attenuation of matrix sediment [HU]”, a high correlation was found ( $R^2 = 0.89$ ;  $p\text{-val.} = < 0.0001$ , Spearman’s test; normally distributed according to Shapiro-wilk test; no heteroscedasticity, Breusch-Pagan test  $p = 0.45$ ). This regression-based validation method illustrates how CT data can be used as a proxy for DBD. Therefore, we here use our lab-measured pycnometer-based density samples throughout the record to calibrate the density profile of the entire core (see Orsi and Anderson, 1999). Assuming a linear regression equation of  $Y = 868 * X + 205$ , with DBD as independent variable, we calculated density X from CT mean x-ray attenuation Y (see Fig. 1).

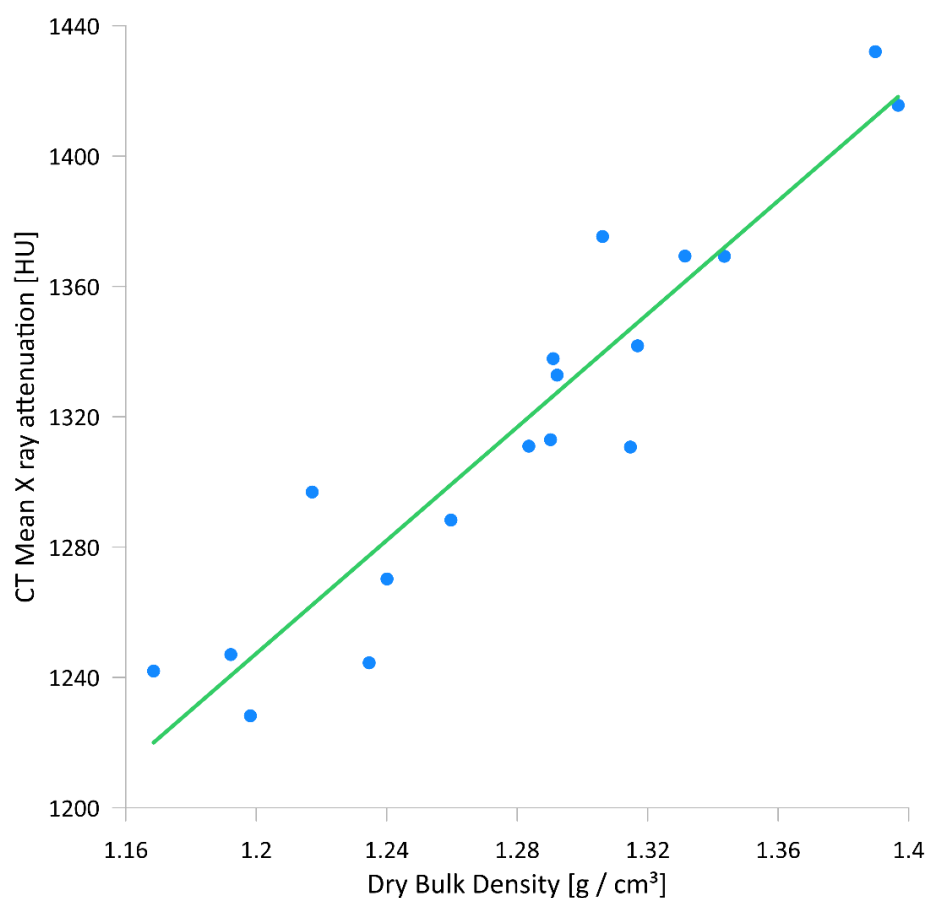

**Fig. S1: Cross-Plot with linear regression fit, plotting Dry Bulk Density (measured with pycnometer) againsts mean X ray attenuation (CT derived high-resolution data). Regression function  $Y = 868 * X + 205$ .**

## S2 Raw Data of TIC/TOC and Density Measurements

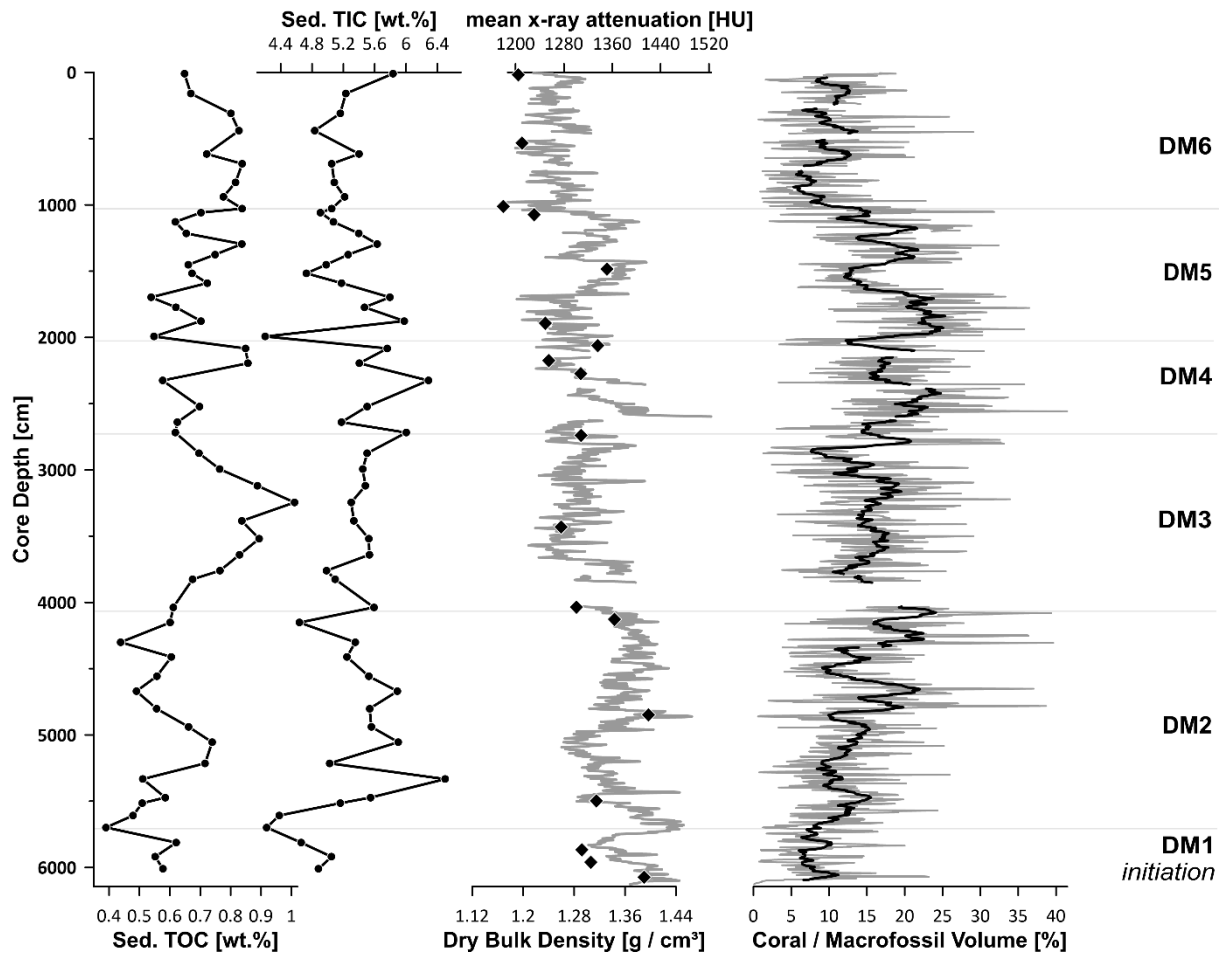

**Fig. S2: Raw data summary from Dragon Mound (GeoB18116-2) measurements, based on new core depth model (CSF-B). TIC/TOC values ( $n = 53$ ) are given in wt.% and refer to the sediment fraction of the record. Dry Bulk Density refers to black dashed line / points. Correlation between CT data and measured density data is clearly visible. Coral volume shows full 5 cm average (grey) and smoothed line (30 cm average) in black. CT / DBD data gaps are due to the recovery < 100 % in some MeBo barrel sections.**

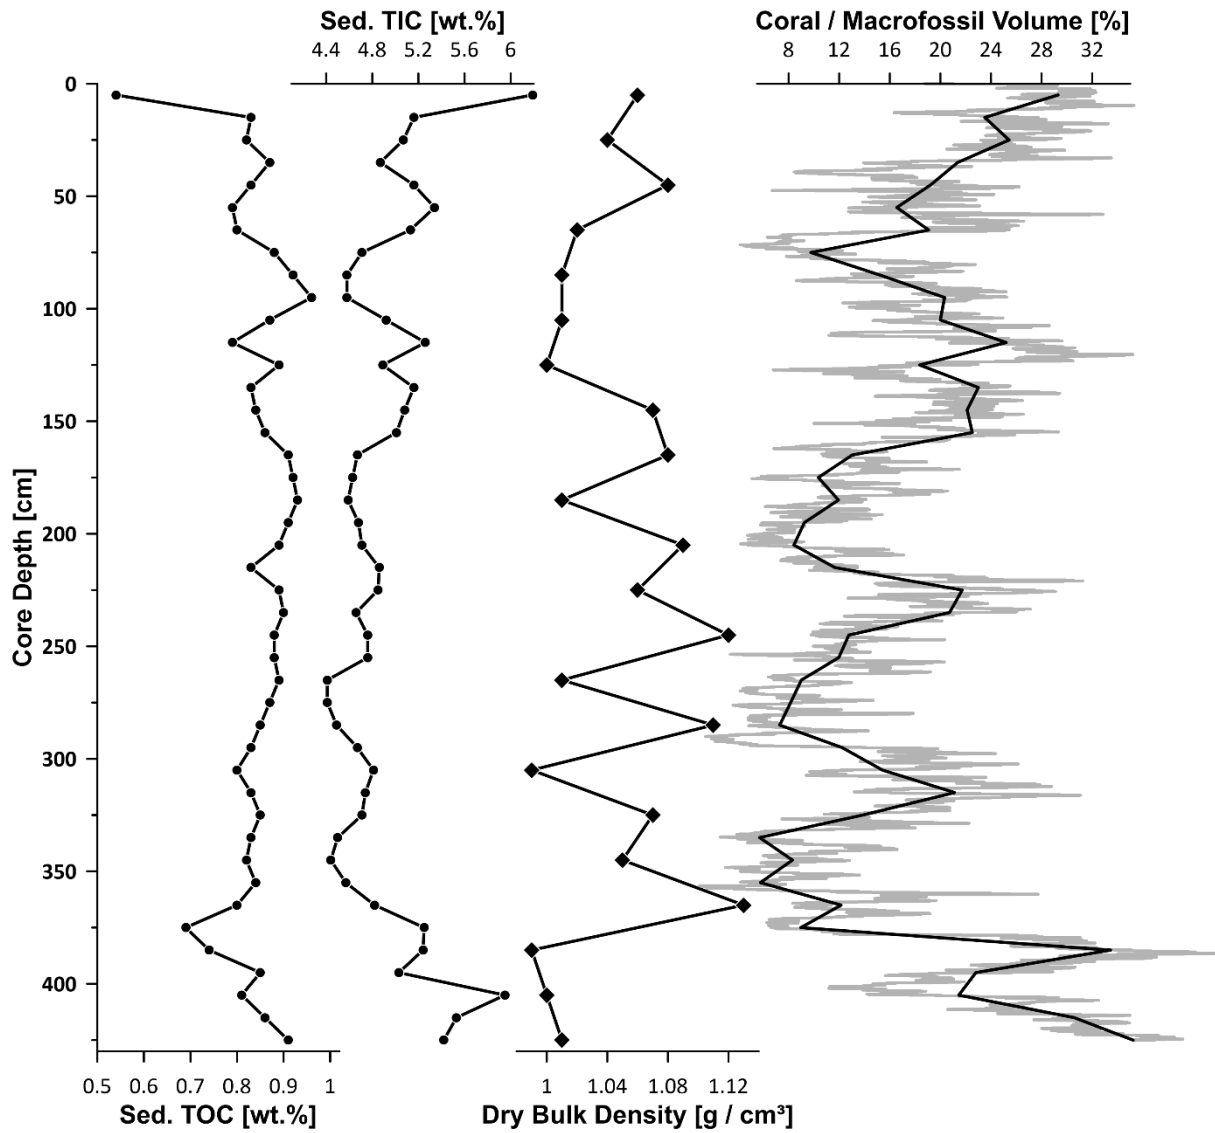

**Fig. S3: Raw data summary from BRI (GeoB13729-1) measurements, based on published data. TIC/TOC values (n = 44; obtained by Wang et al., 2021) are given in wt.% and refer to the sediment fraction of the record. Dry Bulk Density (n = 22) is based on pycnometer measurements by Wang et al. (2021). CT coral content data (vol.%) are based on Titschack et al. (2016). Dark line shows smoothed 10 cm average, grey line represents the raw CT resolution.**

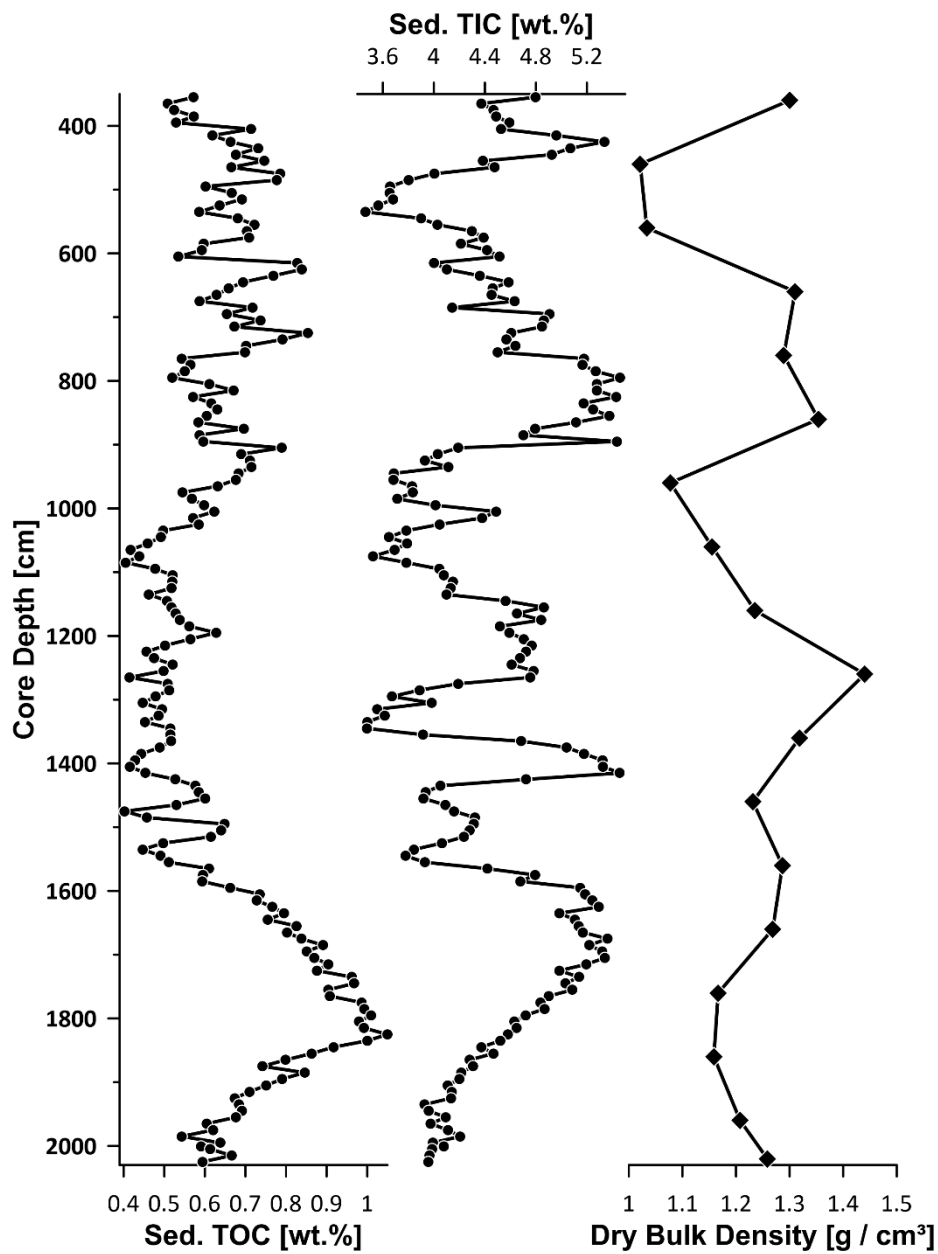

Fig. S4: Raw data summary from Off-Mound core MD13-3457 measurements. TIC/TOC values ( $n = 169$ ) are given in wt.%. Dry Bulk Density is based on pycnometer measurements ( $n = 21$ ), all conducted for this study.

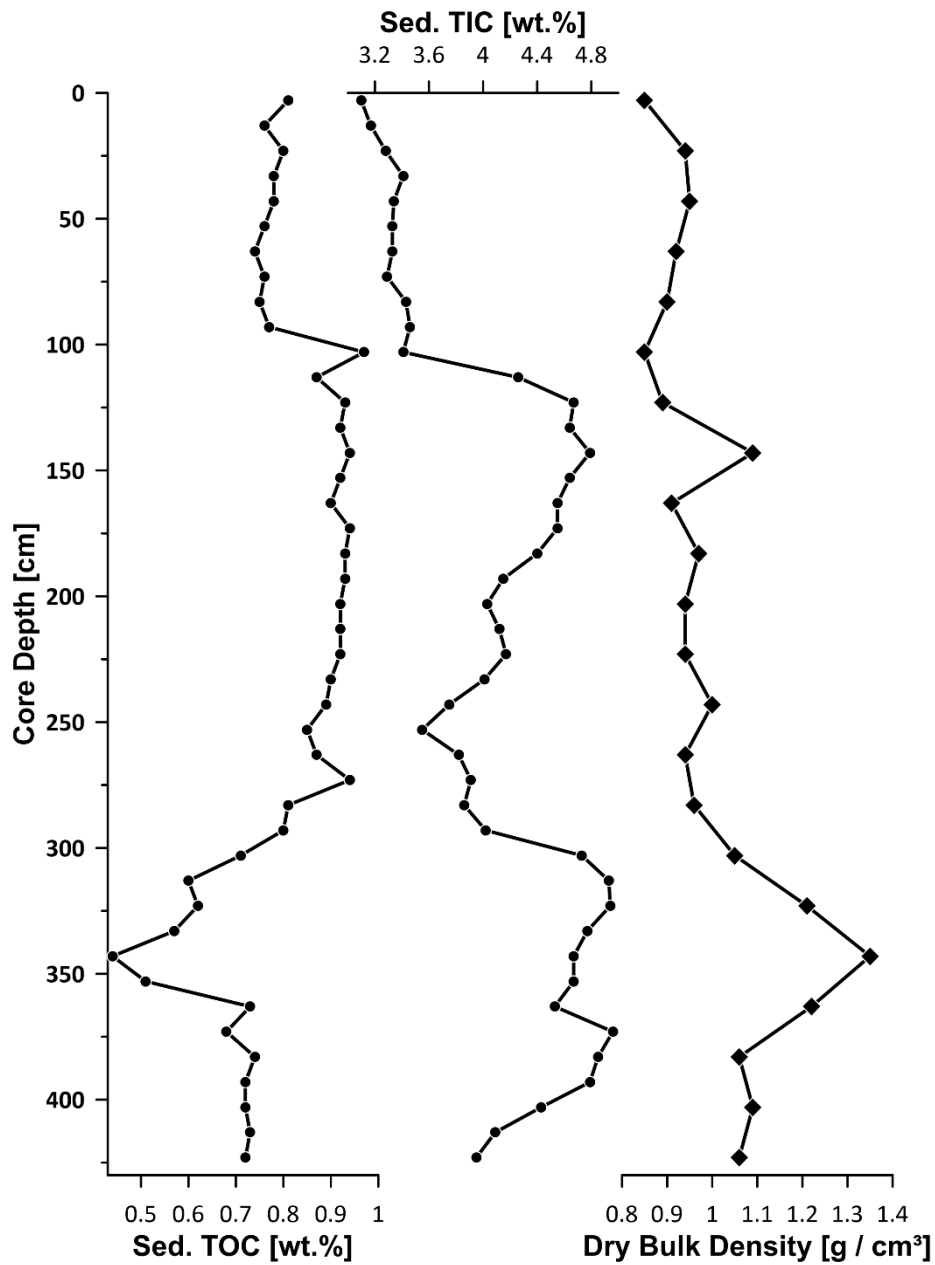

**Fig. S5: Raw data summary from Off-Mound core GeoB13731-1 measurements. TIC/TOC values (n = 43) are given in wt.% and were measured by Wang et al. (2021). Dry Bulk Density is based on pycnometer measurements (n = 22) from Wang et al. (2021), too.**

### S3 Sedimentation Rates, off mound cores

Undatable was used as a novel approach to create age models from marine fossils. However, a linear interpolation between the calibrated AMS  $^{14}\text{C}$  ages was favoured over the 1 cm resolution sedimentation rates given in Undatable (based on Gaussian uncertainty sampling).

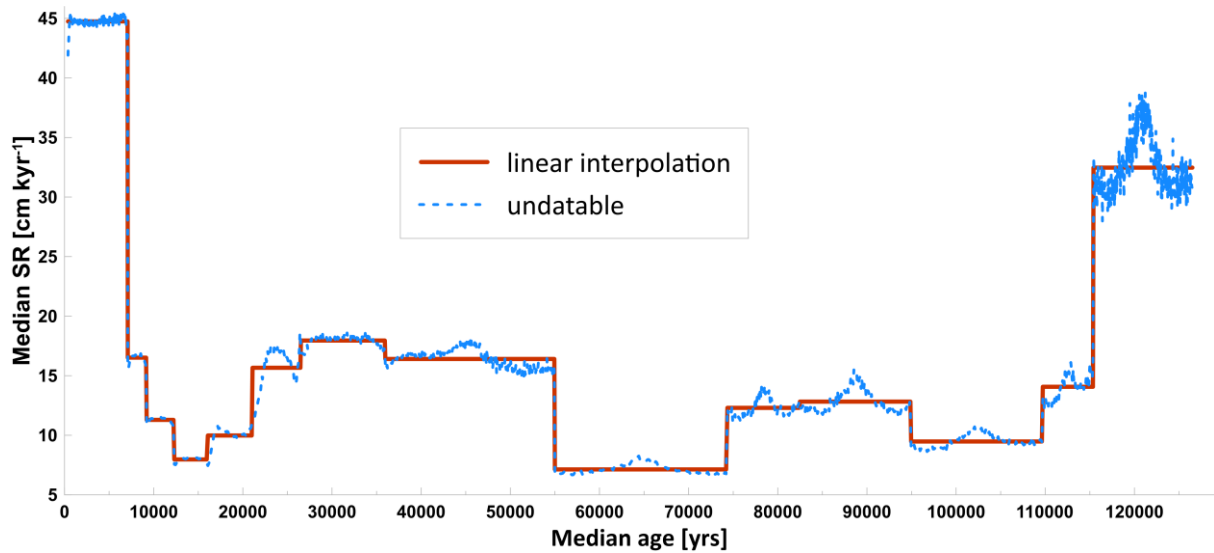

Fig. S6: Median AR (aggradation rate) of off-mound core MD13-3457 across time. Blue dotted line represents the initial age model from Undatable, while the red line represents the linear interpolation between the ages / tie points used in the study.

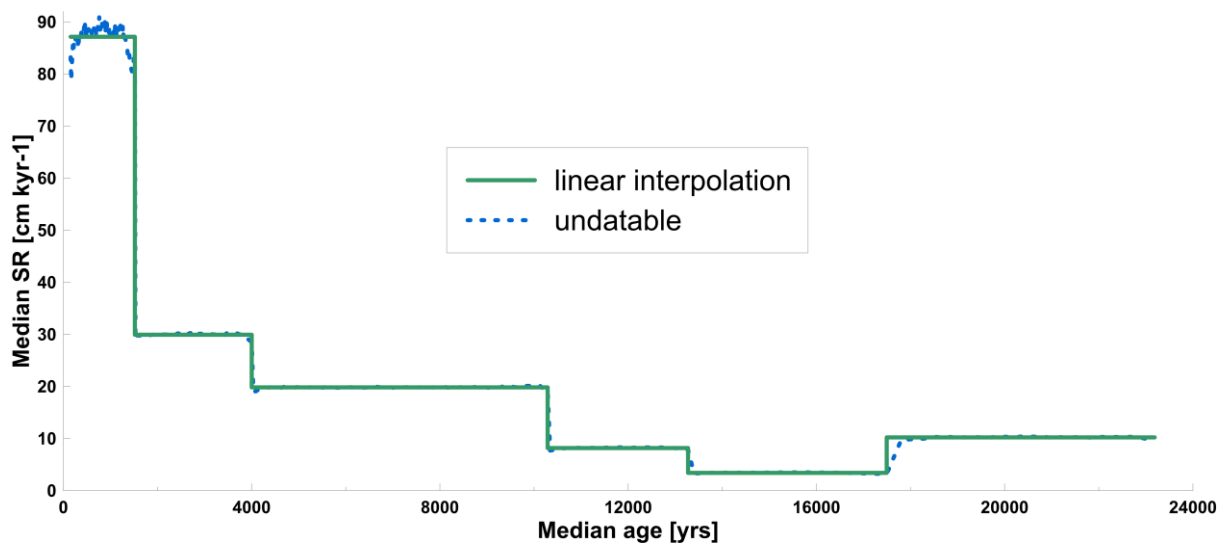

Fig. S7: Median AR (aggradation rate) of off-mound core GeoB13731-1 across time. Blue dotted line represents the initial age model from Undatable, while the green line represents the linear interpolation between the ages used in the study.

**S4 AMS <sup>14</sup>C ages and tie points obtained for MD13-3457**

**Table S1: All ages used for this study from MD13-3457. Sample 1-8 are based on AMS <sup>14</sup>C dating, the others are tie points based on the d18O data from MD13-3457 and the global LR04 stack by Lisiecki and Raymo (2005).**

| <b>Sample ID</b> | <b>Depth [m]</b> | <b>Raw Age [kyr BP]</b> | <b>Age error [kyr BP]</b> | <b>Dating Method</b>          | <b>Reserv. Age [kyr BP]</b> | <b>Reserv. Error [kyr BP]</b> | <b>Calibration</b> | <b>Calib. Age [kyr BP]</b> |
|------------------|------------------|-------------------------|---------------------------|-------------------------------|-----------------------------|-------------------------------|--------------------|----------------------------|
| 1                | 0.03             | 0.75                    | 0.03                      | <sup>14</sup> C marine fossil | 0.422                       | 0.050                         | IntCal20           | 0.391                      |
| 2                | 3.03             | 6.69                    | 0.05                      | <sup>14</sup> C marine fossil | 0.483                       | 0.051                         | IntCal20           | 7.095                      |
| 3                | 3.38             | 8.59                    | 0.05                      | <sup>14</sup> C marine fossil | 0.349                       | 0.057                         | IntCal20           | 9.214                      |
| 4                | 3.73             | 10.54                   | 0.06                      | <sup>14</sup> C marine fossil | 0.108                       | 0.052                         | IntCal20           | 12.314                     |
| 5                | 4.03             | 13.47                   | 0.08                      | <sup>14</sup> C marine fossil | 0.117                       | 0.188                         | IntCal20           | 16.077                     |
| 6                | 4.53             | 22.51                   | 0.15                      | <sup>14</sup> C marine fossil | 0.157                       | 0.268                         | IntCal20           | 21.087                     |
| 7                | 5.38             | 22.37                   | 0.40                      | <sup>14</sup> C marine fossil | 0.190                       | 0.263                         | IntCal20           | 26.513                     |
| 8                | 7.08             | 31.80                   | 0.50                      | <sup>14</sup> C marine fossil | 0.178                       | 0.219                         | IntCal20           | 35.982                     |
| s1               | 10.2             | 55.00                   | 4.00                      | tie point                     | n/a                         | n/a                           | n/a                | 55.000                     |
| s2               | 11.58            | 75.00                   | 4.00                      | tie point                     | n/a                         | n/a                           | n/a                | 74.351                     |
| s3               | 12.58            | 82.50                   | 4.00                      | tie point                     | n/a                         | n/a                           | n/a                | 82.479                     |
| s4               | 14.18            | 95.00                   | 4.00                      | tie point                     | n/a                         | n/a                           | n/a                | 94.955                     |
| s5               | 15.58            | 112.00                  | 4.00                      | tie point                     | n/a                         | n/a                           | n/a                | 109.726                    |
| s6               | 16.38            | 115.50                  | 4.00                      | tie point                     | n/a                         | n/a                           | n/a                | 115.412                    |
| s7               | 19.98            | 126.50                  | 4.00                      | tie point                     | n/a                         | n/a                           | n/a                | 126.499                    |

S5  $\delta^{18}\text{O}$  ‰ curve MD13-3457 and corresponding tie points for age model construction

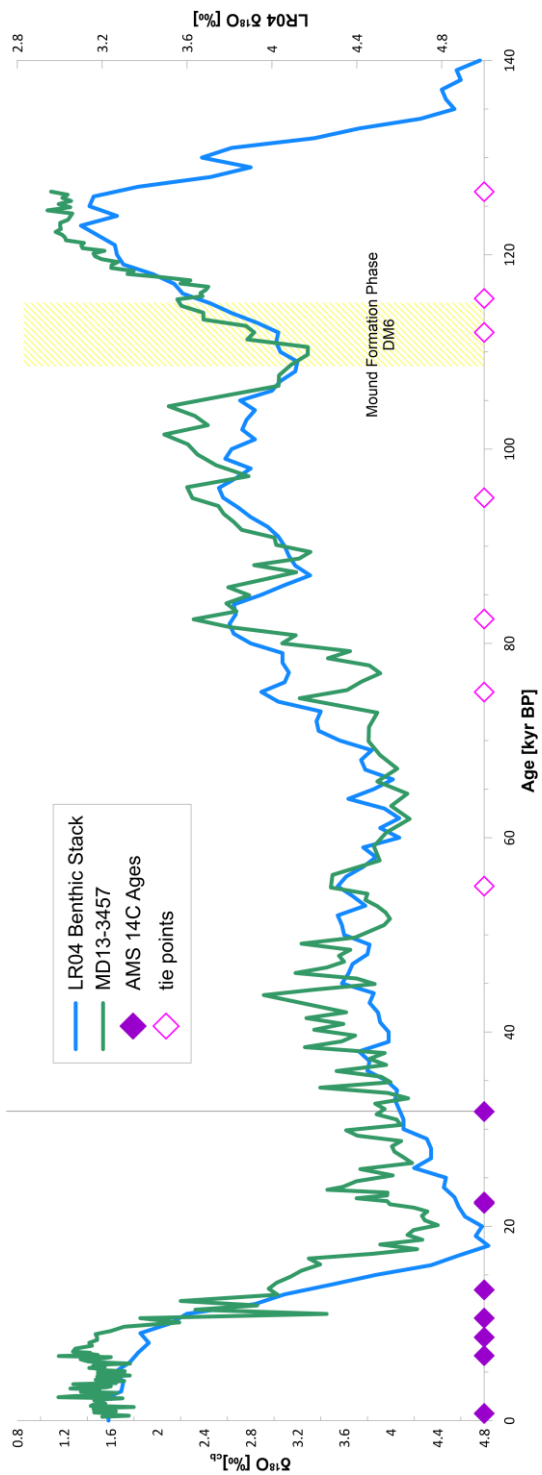

Fig. S8: Visual alignment of LR04 benthic stack and the  $\delta^{18}\text{O}$  ‰ curve based on Stable oxygen isotopes ( $\delta^{18}\text{O}$ ) obtained from the benthic foraminifera *Cibicidoides mundulus*. Dated ages and tie points are indicated. Yellow box indicated the period of mound formation during MIS5d on Dragon Mound (DM6).



## S6 carbon accumulation rates off-mound during BRI<sub>final</sub> and DM6

**Table S2: Values from both off-mound records GeoB13731-1 and MD13-3457 identified as corresponding to the mound formation phases of BRI<sub>final</sub> (9 – 12 kyr BP; MIS1) and DM6 (~108 – 115 kyr BP; MIS5). Ages and sedimentation rates (SR) based on age models above. DBD for Dry Bulk Density. TOC/TIC values given in content weight-%. C(in)org Acc stands for (in)organic carbon accumulation. Note that mean values presented in the manuscript are based on weighted sedimentation rate means.**

| Core        | Depth<br>[cm] | Age<br>[kyr BP] | TOC<br>[%] | TIC<br>[%] | DBD<br>[g/cm <sup>3</sup> ] | SR<br>[cm kyr <sup>-1</sup> ] | C <sub>org</sub><br>Acc [g<br>cm <sup>-2</sup> ky <sup>-1</sup> ] | C <sub>inorg</sub><br>Acc [g<br>cm <sup>-2</sup> ky <sup>-1</sup> ] | Total Carbon<br>Acc [g<br>cm <sup>-2</sup> ky <sup>-1</sup> ] |
|-------------|---------------|-----------------|------------|------------|-----------------------------|-------------------------------|-------------------------------------------------------------------|---------------------------------------------------------------------|---------------------------------------------------------------|
| GeoB13731-1 | 293           | 8.58            | 0.80       | 4.02       | 1.01                        | 19.8                          | 0.16                                                              | 0.80                                                                | 0.96                                                          |
| GeoB13731-1 | 303           | 9.09            | 0.71       | 4.73       | 1.05                        | 19.8                          | 0.15                                                              | 0.98                                                                | 1.13                                                          |
| GeoB13731-1 | 313           | 9.59            | 0.60       | 4.93       | 1.13                        | 19.8                          | 0.13                                                              | 1.10                                                                | 1.24                                                          |
| GeoB13731-1 | 323           | 10.09           | 0.62       | 4.94       | 1.21                        | 19.8                          | 0.15                                                              | 1.19                                                                | 1.33                                                          |
| GeoB13731-1 | 333           | 10.97           | 0.57       | 4.77       | 1.28                        | 8.2                           | 0.06                                                              | 0.50                                                                | 0.56                                                          |
| GeoB13731-1 | 343           | 12.18           | 0.44       | 4.67       | 1.35                        | 8.2                           | 0.05                                                              | 0.52                                                                | 0.56                                                          |
| MD13-3457   | 1545          | 108.34          | 0.49       | 3.78       | 1.28                        | 9.5                           | 0.06                                                              | 0.46                                                                | 0.52                                                          |
| MD13-3457   | 1555          | 109.41          | 0.51       | 3.93       | 1.28                        | 9.5                           | 0.06                                                              | 0.48                                                                | 0.54                                                          |
| MD13-3457   | 1565          | 110.27          | 0.61       | 4.42       | 1.29                        | 14.1                          | 0.11                                                              | 0.80                                                                | 0.91                                                          |
| MD13-3457   | 1575          | 111.05          | 0.60       | 4.80       | 1.26                        | 14.1                          | 0.11                                                              | 0.85                                                                | 0.95                                                          |
| MD13-3457   | 1585          | 111.80          | 0.59       | 4.68       | 1.23                        | 14.1                          | 0.10                                                              | 0.81                                                                | 0.91                                                          |
| MD13-3457   | 1595          | 112.48          | 0.66       | 5.15       | 1.20                        | 14.1                          | 0.11                                                              | 0.87                                                                | 0.98                                                          |
| MD13-3457   | 1605          | 113.13          | 0.74       | 5.19       | 1.17                        | 14.1                          | 0.12                                                              | 0.86                                                                | 0.98                                                          |
| MD13-3457   | 1615          | 113.83          | 0.73       | 5.24       | 1.15                        | 14.1                          | 0.12                                                              | 0.85                                                                | 0.96                                                          |
| MD13-3457   | 1625          | 114.54          | 0.77       | 5.29       | 1.12                        | 14.1                          | 0.12                                                              | 0.83                                                                | 0.95                                                          |
| MD13-3457   | 1635          | 115.21          | 0.80       | 4.99       | 1.09                        | 14.1                          | 0.12                                                              | 0.77                                                                | 0.89                                                          |

## S7 CT scans of Dragon Mound (GeoB18116-2)

The following section provides all obtained CT data in this study, referring to the 60 m long CT scan of Dragon Mound, consisting of 26 barrels. Each figure shows, from left to right, CT orthoslice, 3D macrofossil reconstruction, a mean grain size distribution plot as well as a clast orientation plot, several graphs representing coral content (vol. %), the mean x-ray attenuation in Hounsfield Units [HU], and its standard deviation, all along the corresponding core depth. To avoid distortion of the CT images, the following figures show the core depth based on CSF-A.

GeoB18116-2 P1

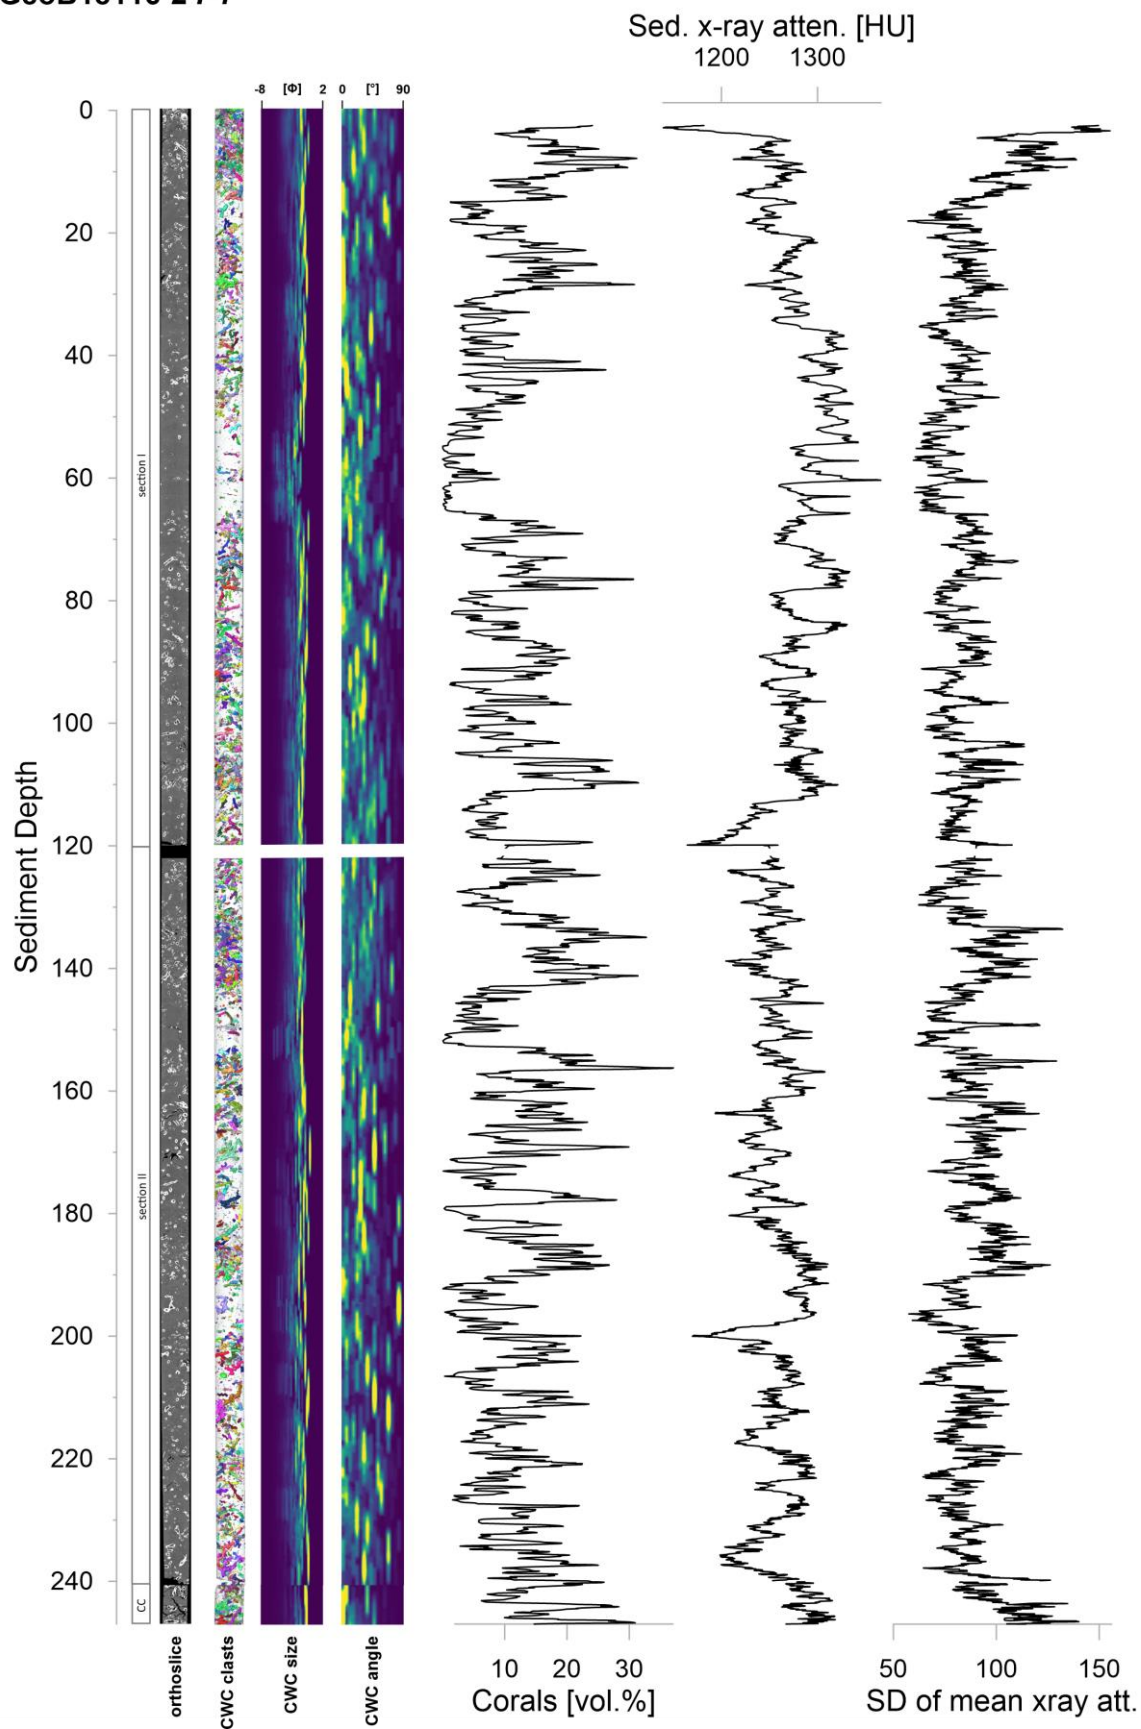

Fig. S9: CT-derived core data for GeoB18116-2 Barrel P1, with Sediment Depth as CSF-A (mbsf), orthoslice, section number (CC = core catcher), cold-water coral fossil clast quantification, size and angle, coral volume and mean x-ray attenuation in HU (Hounsfield units), and SD.

GeoB18116-2 P2

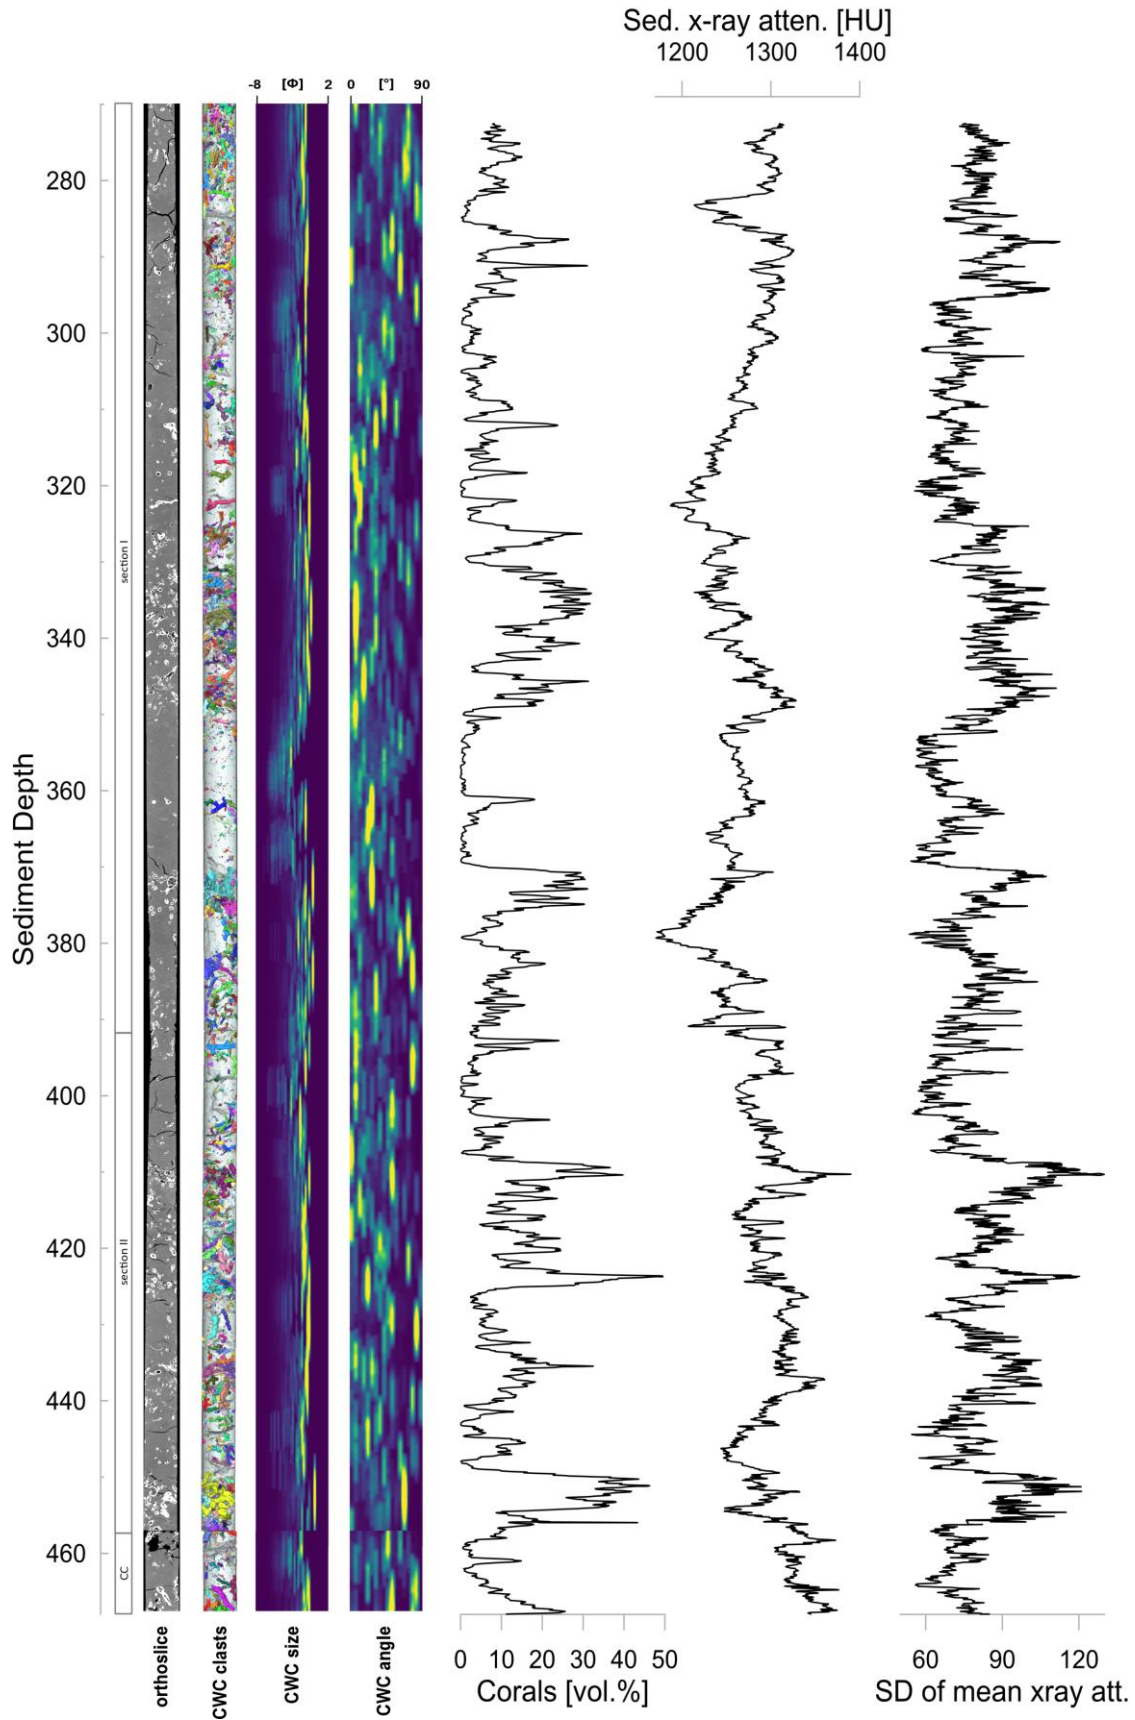

Fig. S10: CT-derived core data for GeoB18116-2 Barrel P2, with Sediment Depth as CSF-A (mbsf), orthoslice, section number (CC = core catcher), cold-water coral fossil clast quantification, size and angle, coral volume and mean x-ray attenuation in HU (Hounsfield units), and SD.

GeoB18116-2 P3

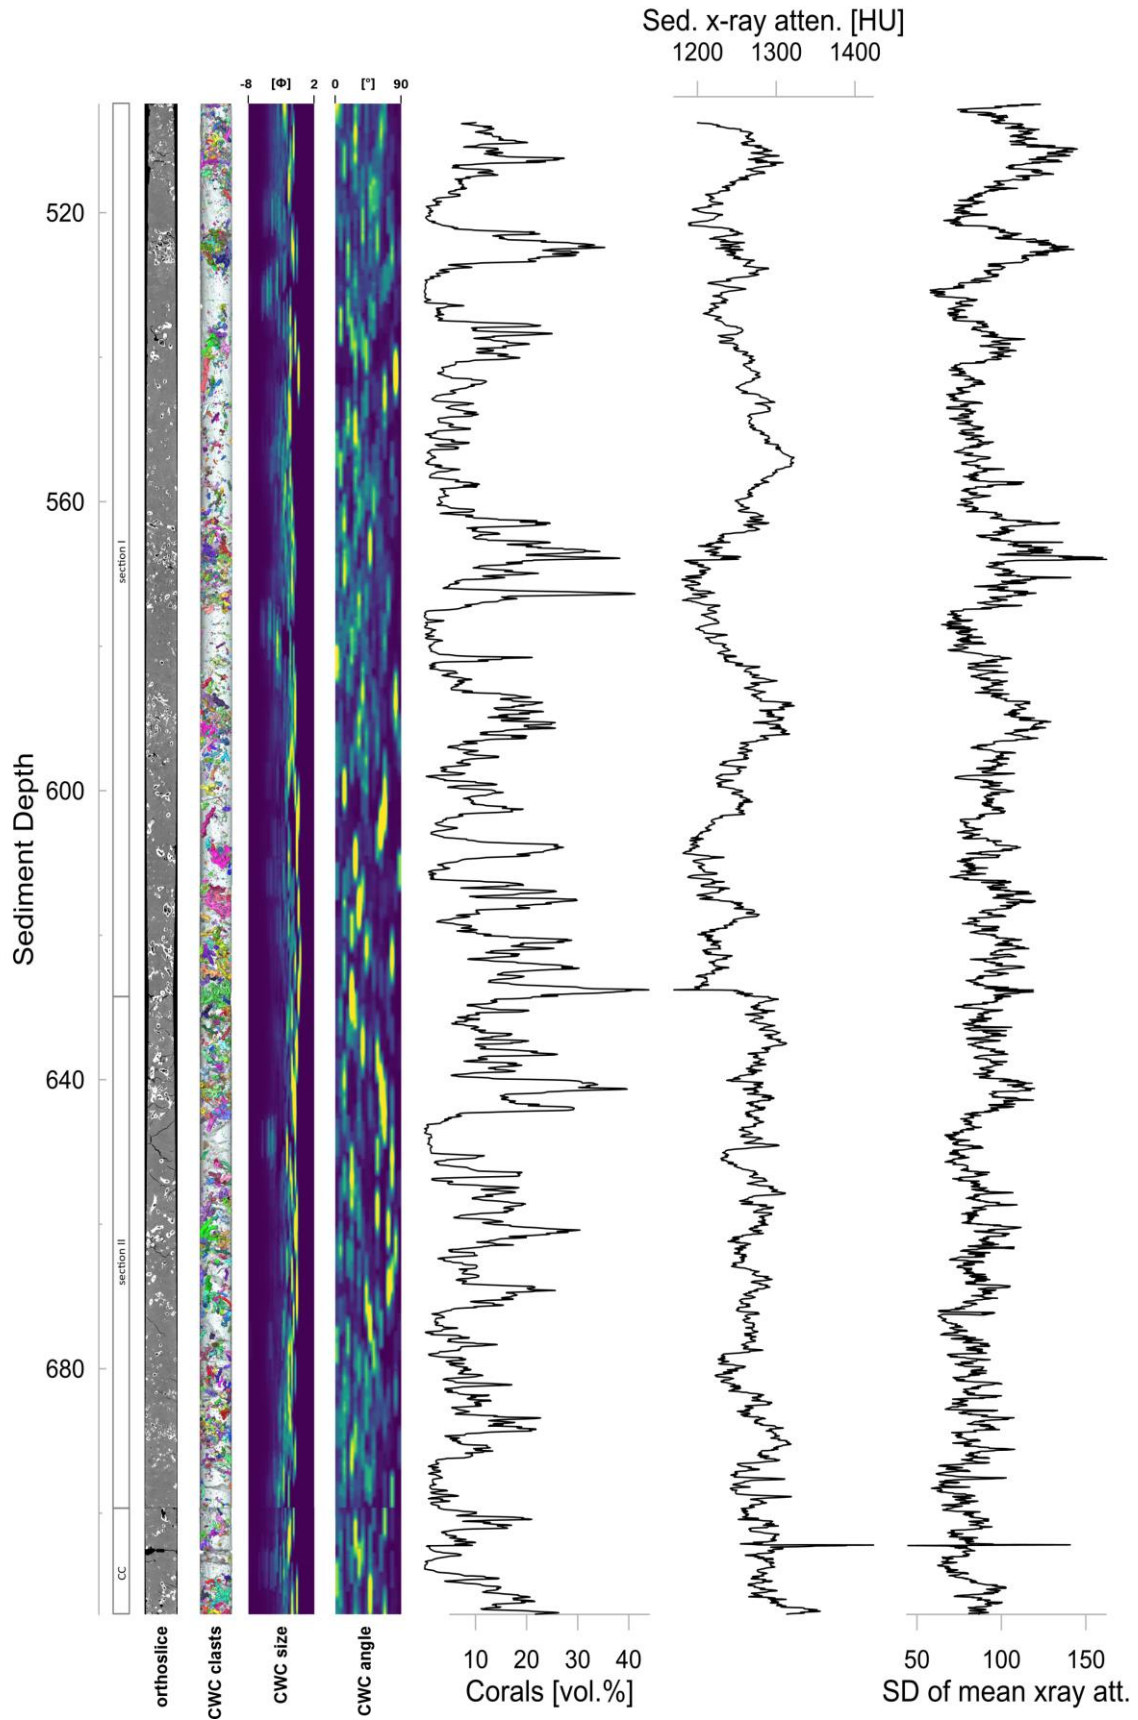

Fig. S11: CT-derived core data for GeoB18116-2 Barrel P3, with Sediment Depth as CSF-A (mbsf), orthoslice, section number (CC = core catcher), cold-water coral fossil clast quantification, size and angle, coral volume and mean x-ray attenuation in HU (Hounsfield units), and SD.

GeoB18116-2 P4

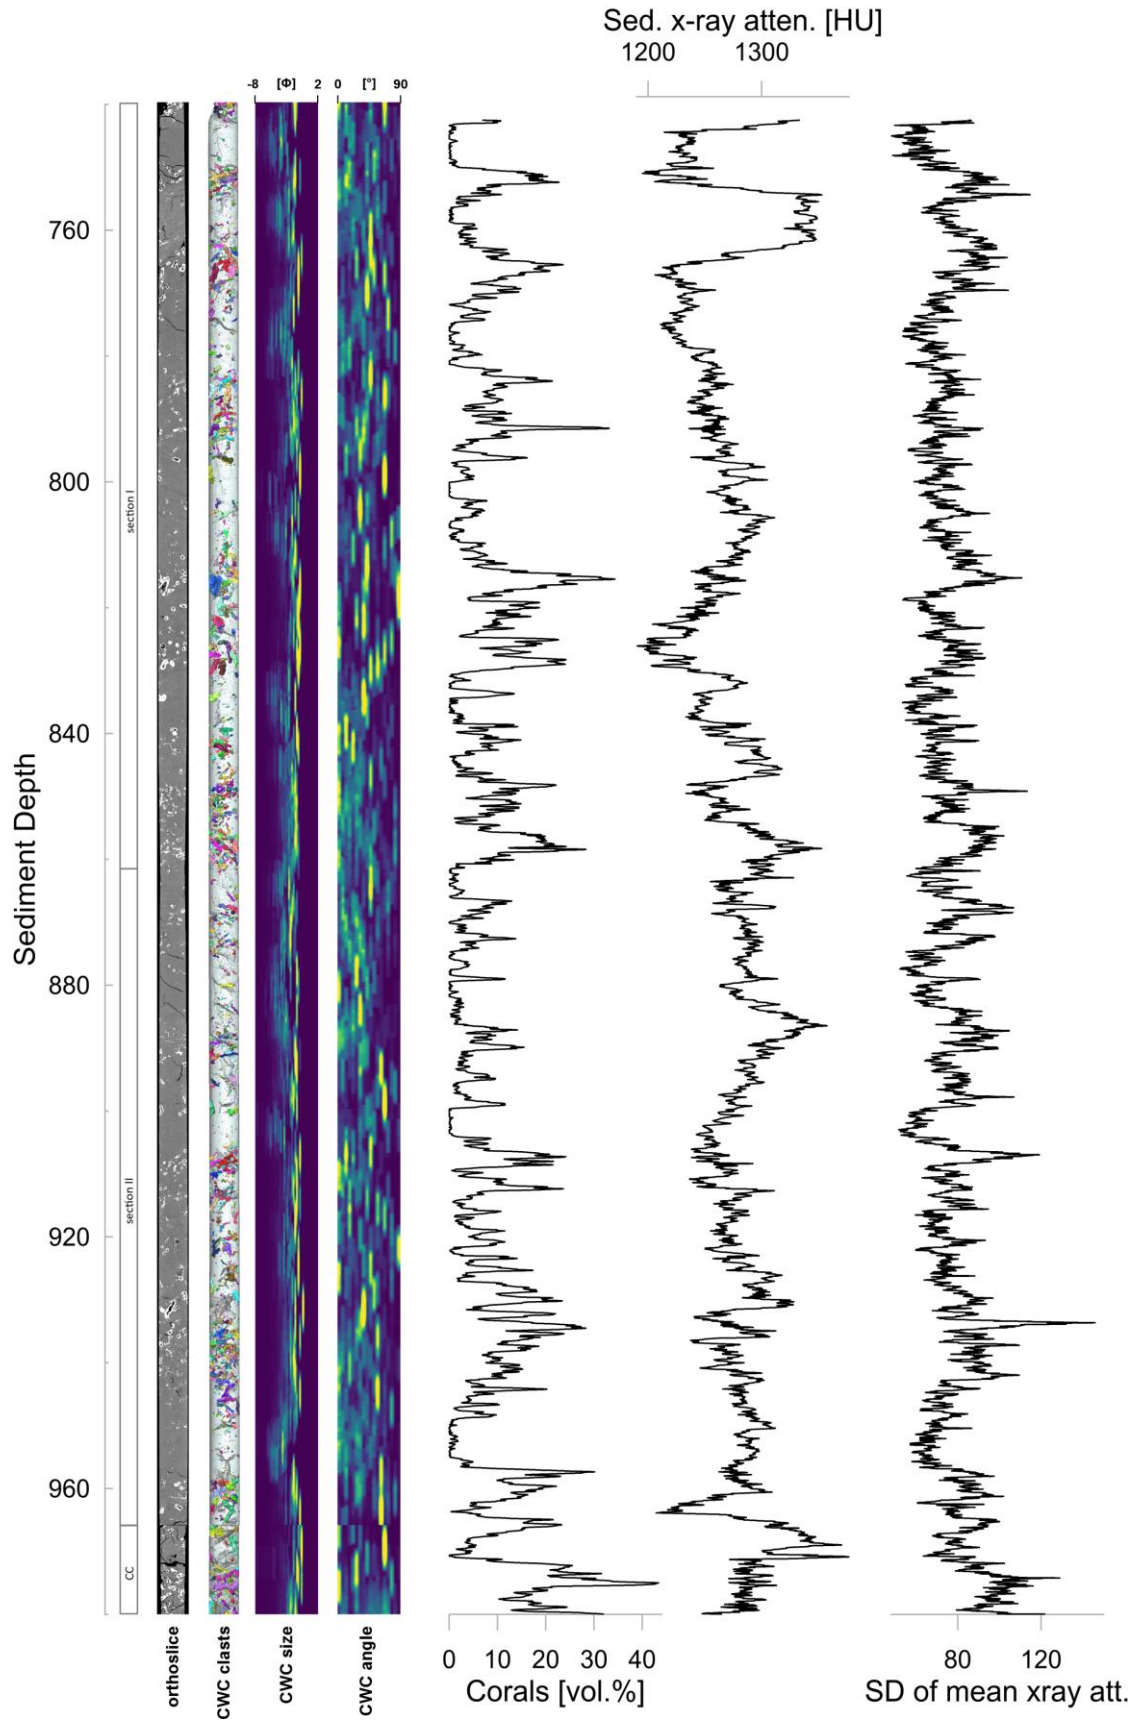

Fig. S12: CT-derived core data for GeoB18116-2 Barrel P4, with Sediment Depth as CSF-A (mbsf), orthoslice, section number (CC = core catcher), cold-water coral fossil clast quantification, size and angle, coral volume and mean x-ray attenuation in HU (Hounsfield units), and SD.

GeoB18116-2 P5

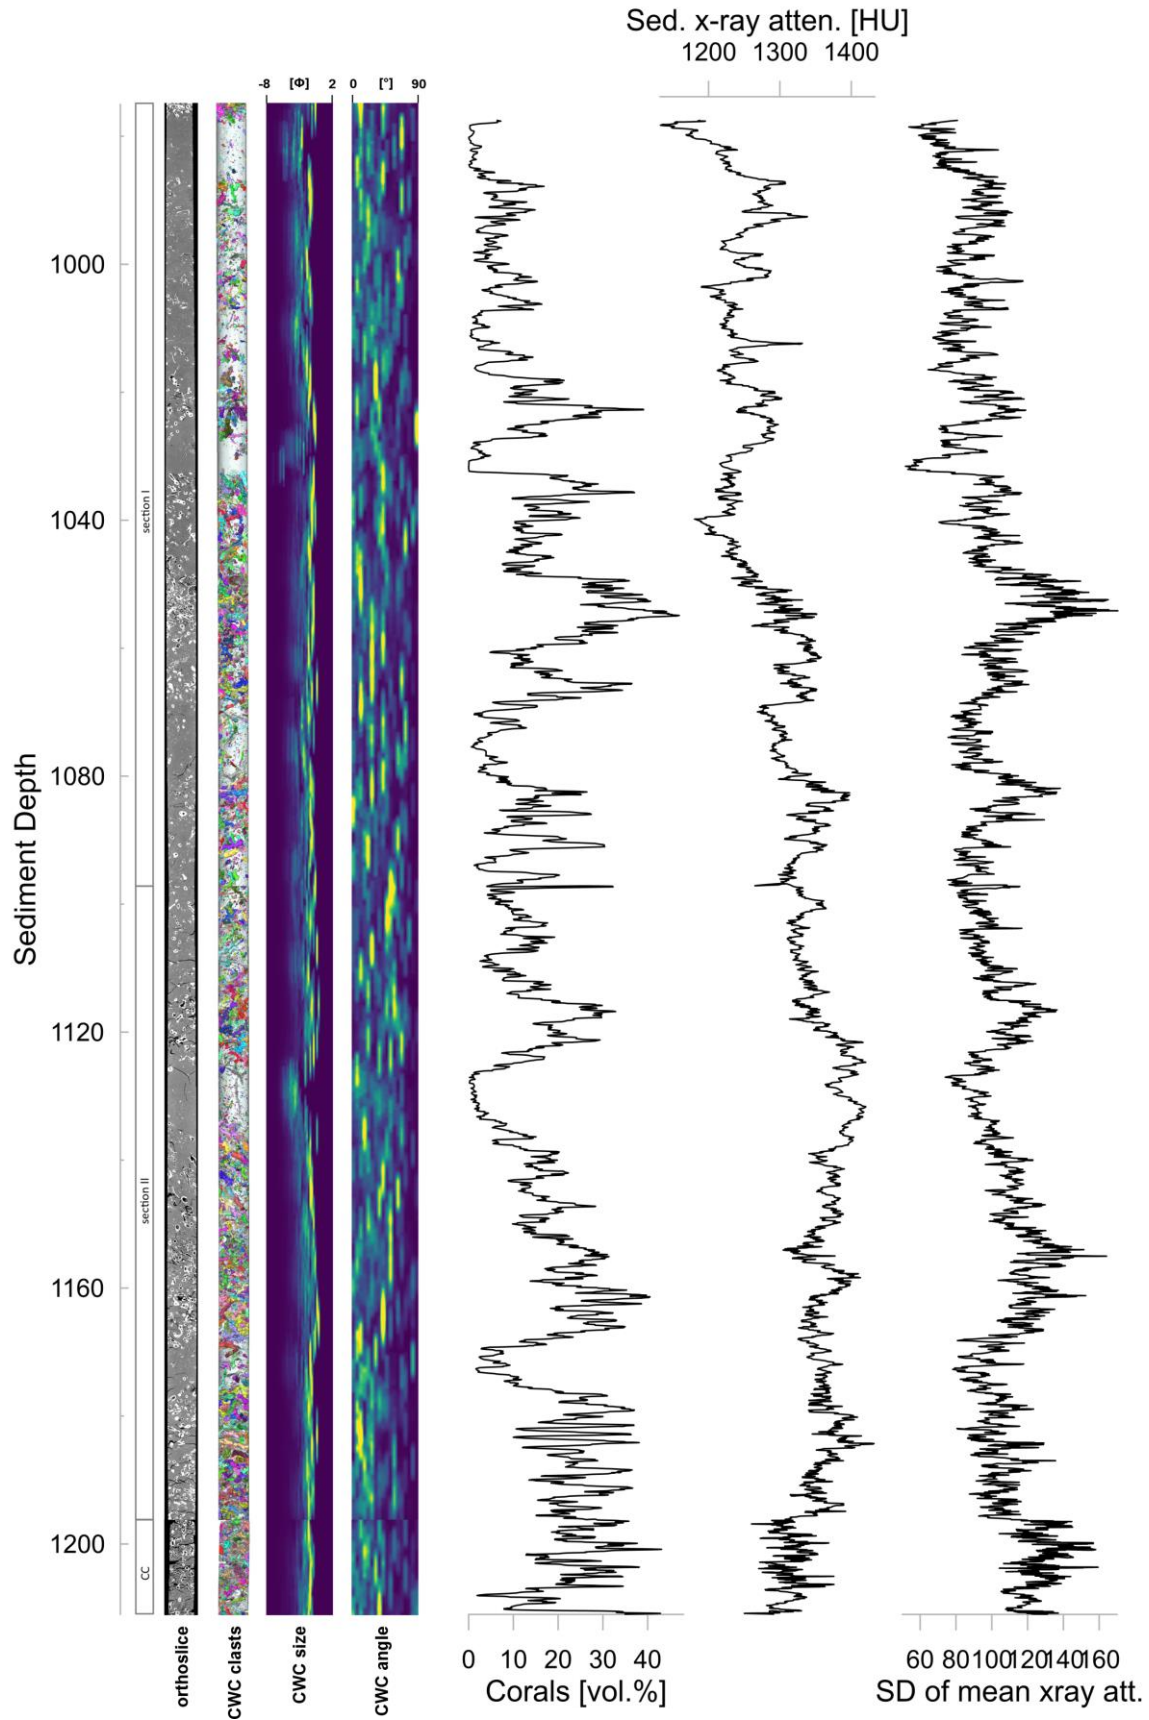

Fig. S13: CT-derived core data for GeoB18116-2 Barrel P5, with Sediment Depth as CSF-A (mbsf), orthoslice, section number (CC = core catcher), cold-water coral fossil clast quantification, size and angle, coral volume and mean x-ray attenuation in HU (Hounsfield units), and SD.

GeoB18116-2 P6

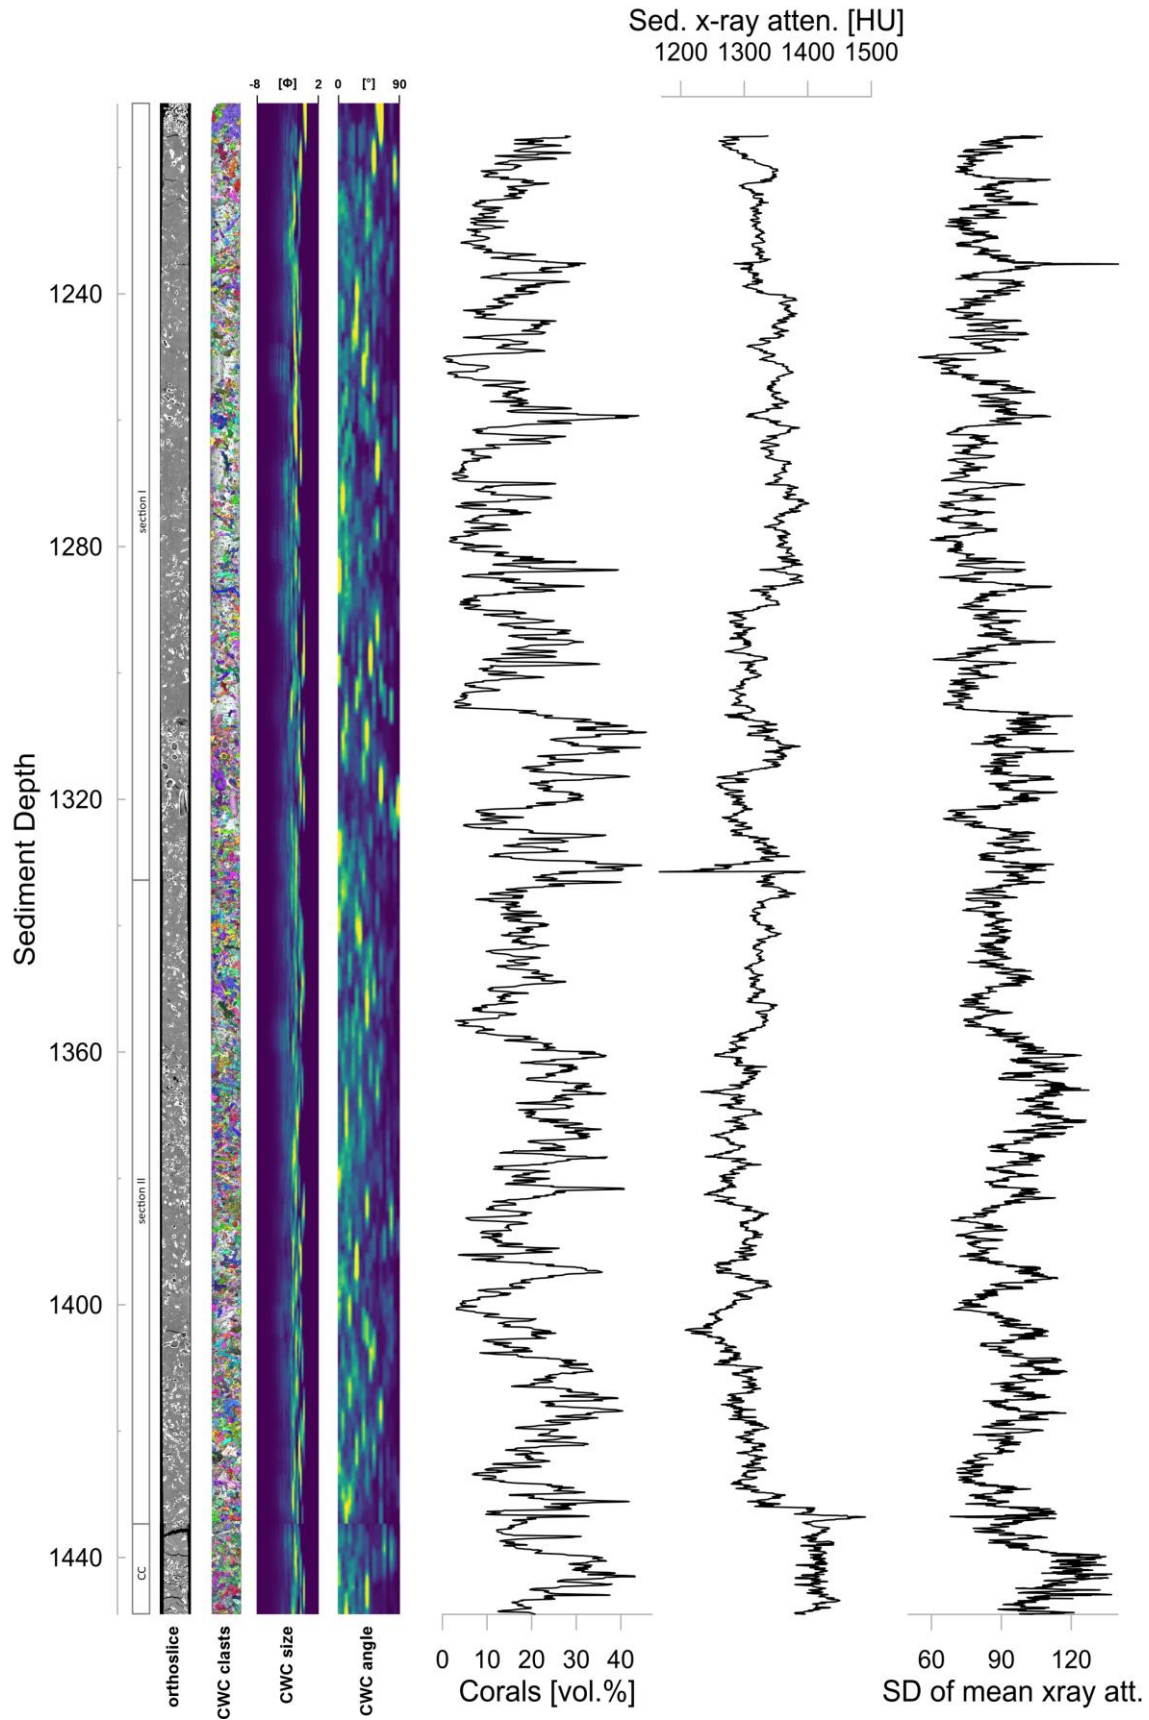

Fig. S14: CT-derived core data for GeoB18116-2 Barrel P6, with Sediment Depth as CSF-A (mbsf), orthoslice, section number (CC = core catcher), cold-water coral fossil clast quantification, size and angle, coral volume and mean x-ray attenuation in HU (Hounsfield units), and SD.

GeoB18116-2 P7

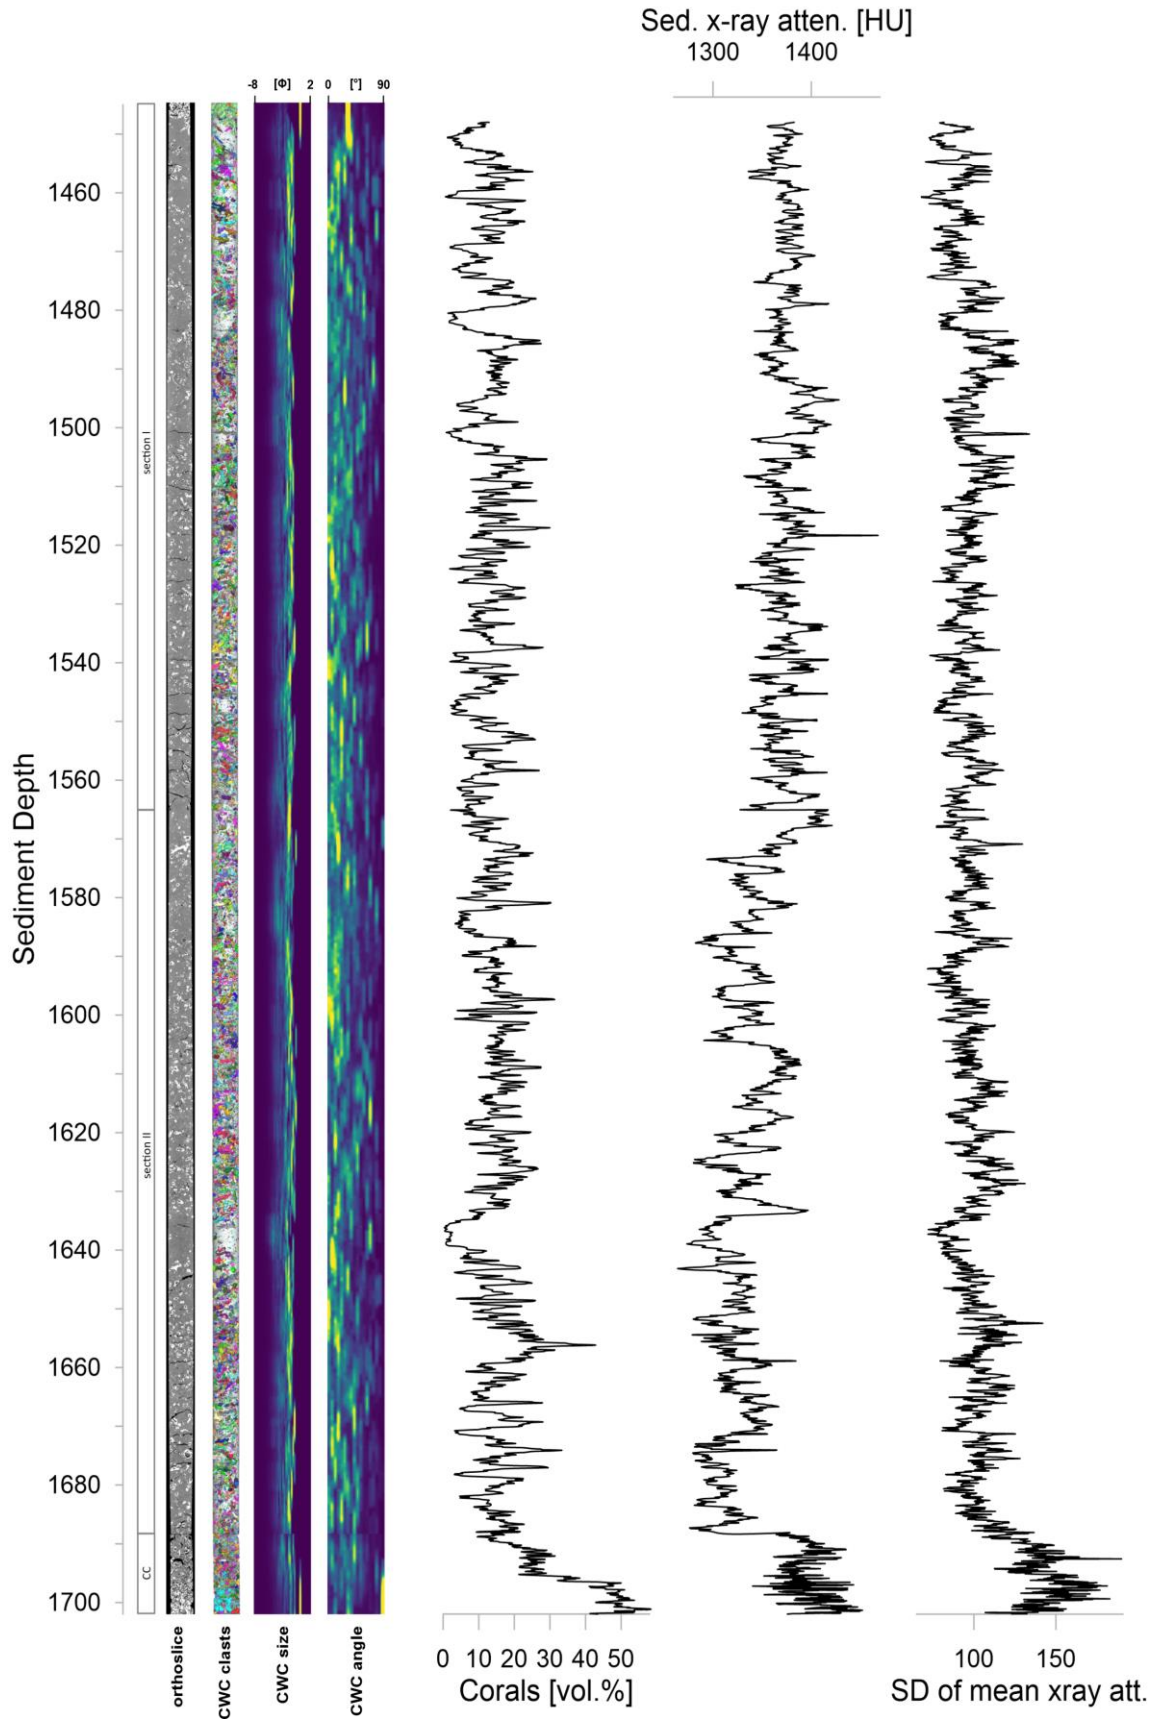

Fig. S15: CT-derived core data for GeoB18116-2 Barrel P7, with Sediment Depth as CSF-A (mbsf), orthoslice, section number (CC = core catcher), cold-water coral fossil clast quantification, size and angle, coral volume and mean x-ray attenuation in HU (Hounsfield units), and SD.



GeoB18116-2 P8

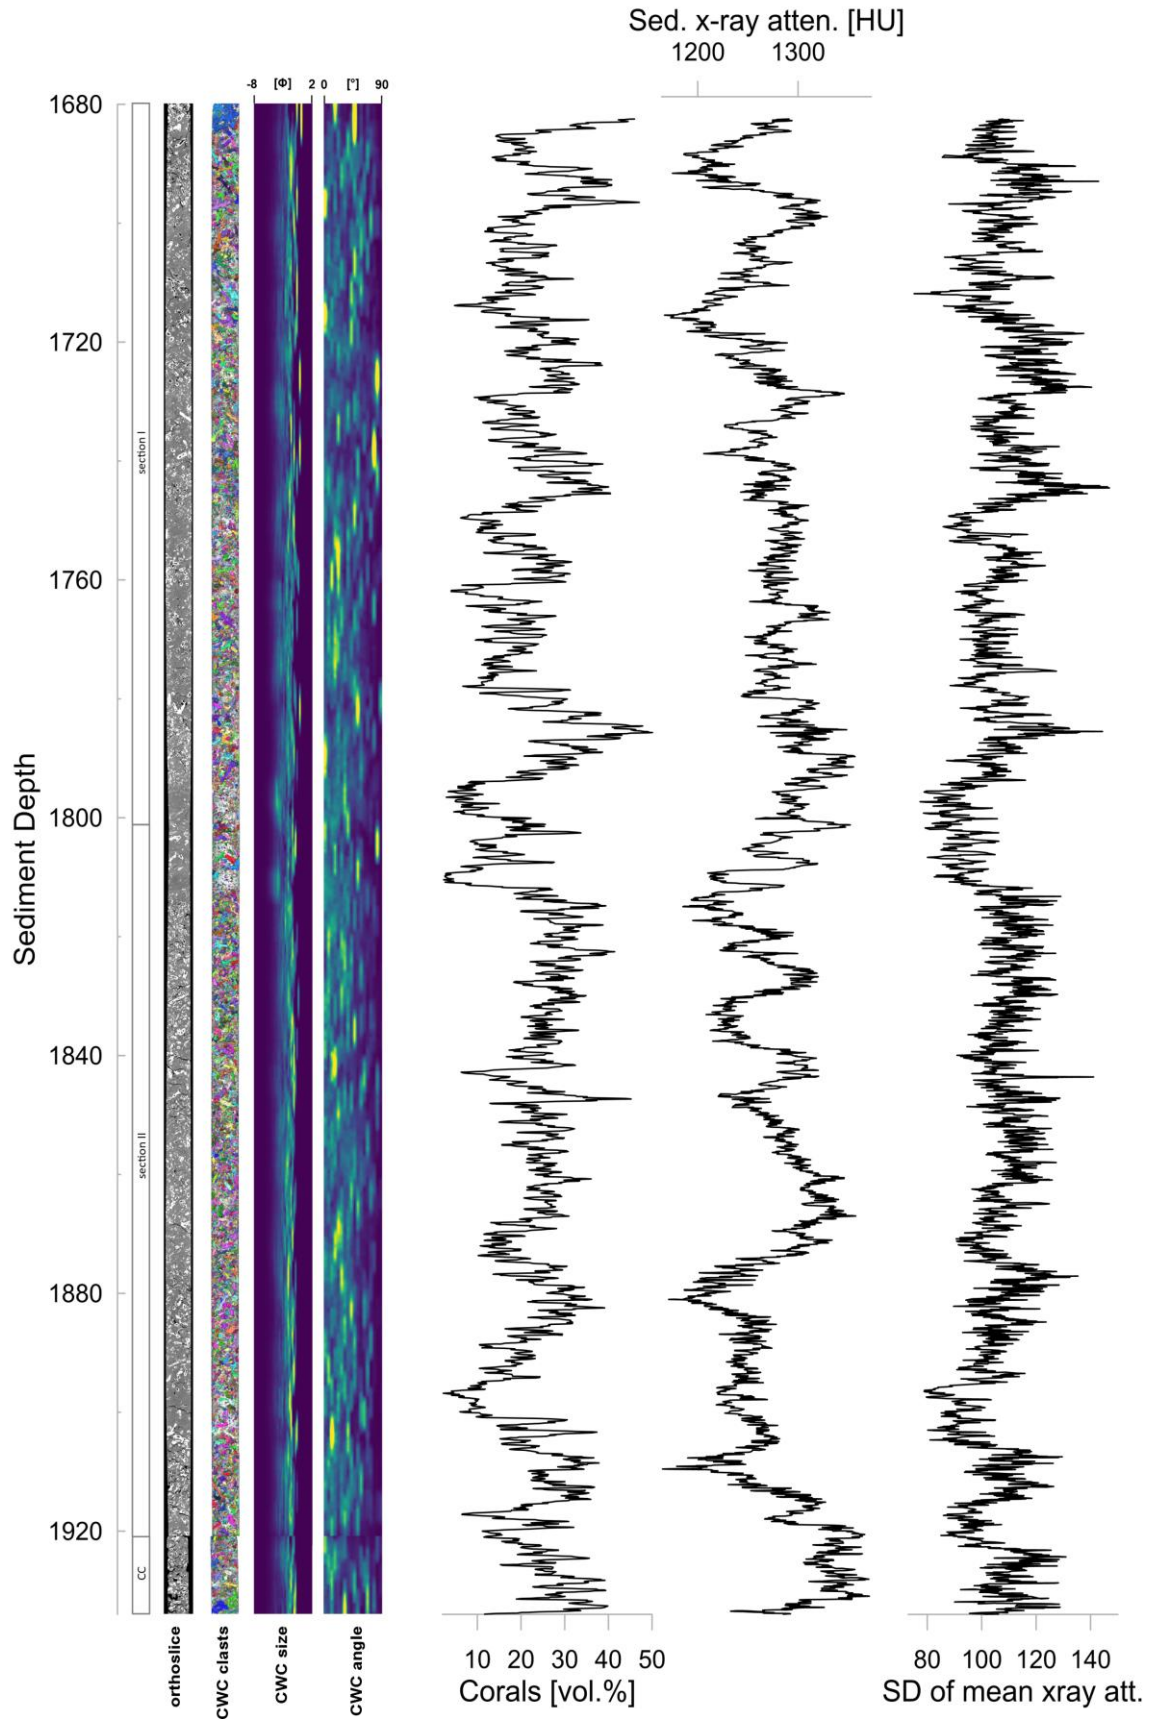

Fig. S16: CT-derived core data for GeoB18116-2 Barrel P8, with Sediment Depth as CSF-A (mbsf), orthoslice, section number (CC = core catcher), cold-water coral fossil clast quantification, size and angle, coral volume and mean x-ray attenuation in HU (Hounsfield units), and SD.

GeoB18116-2 P9

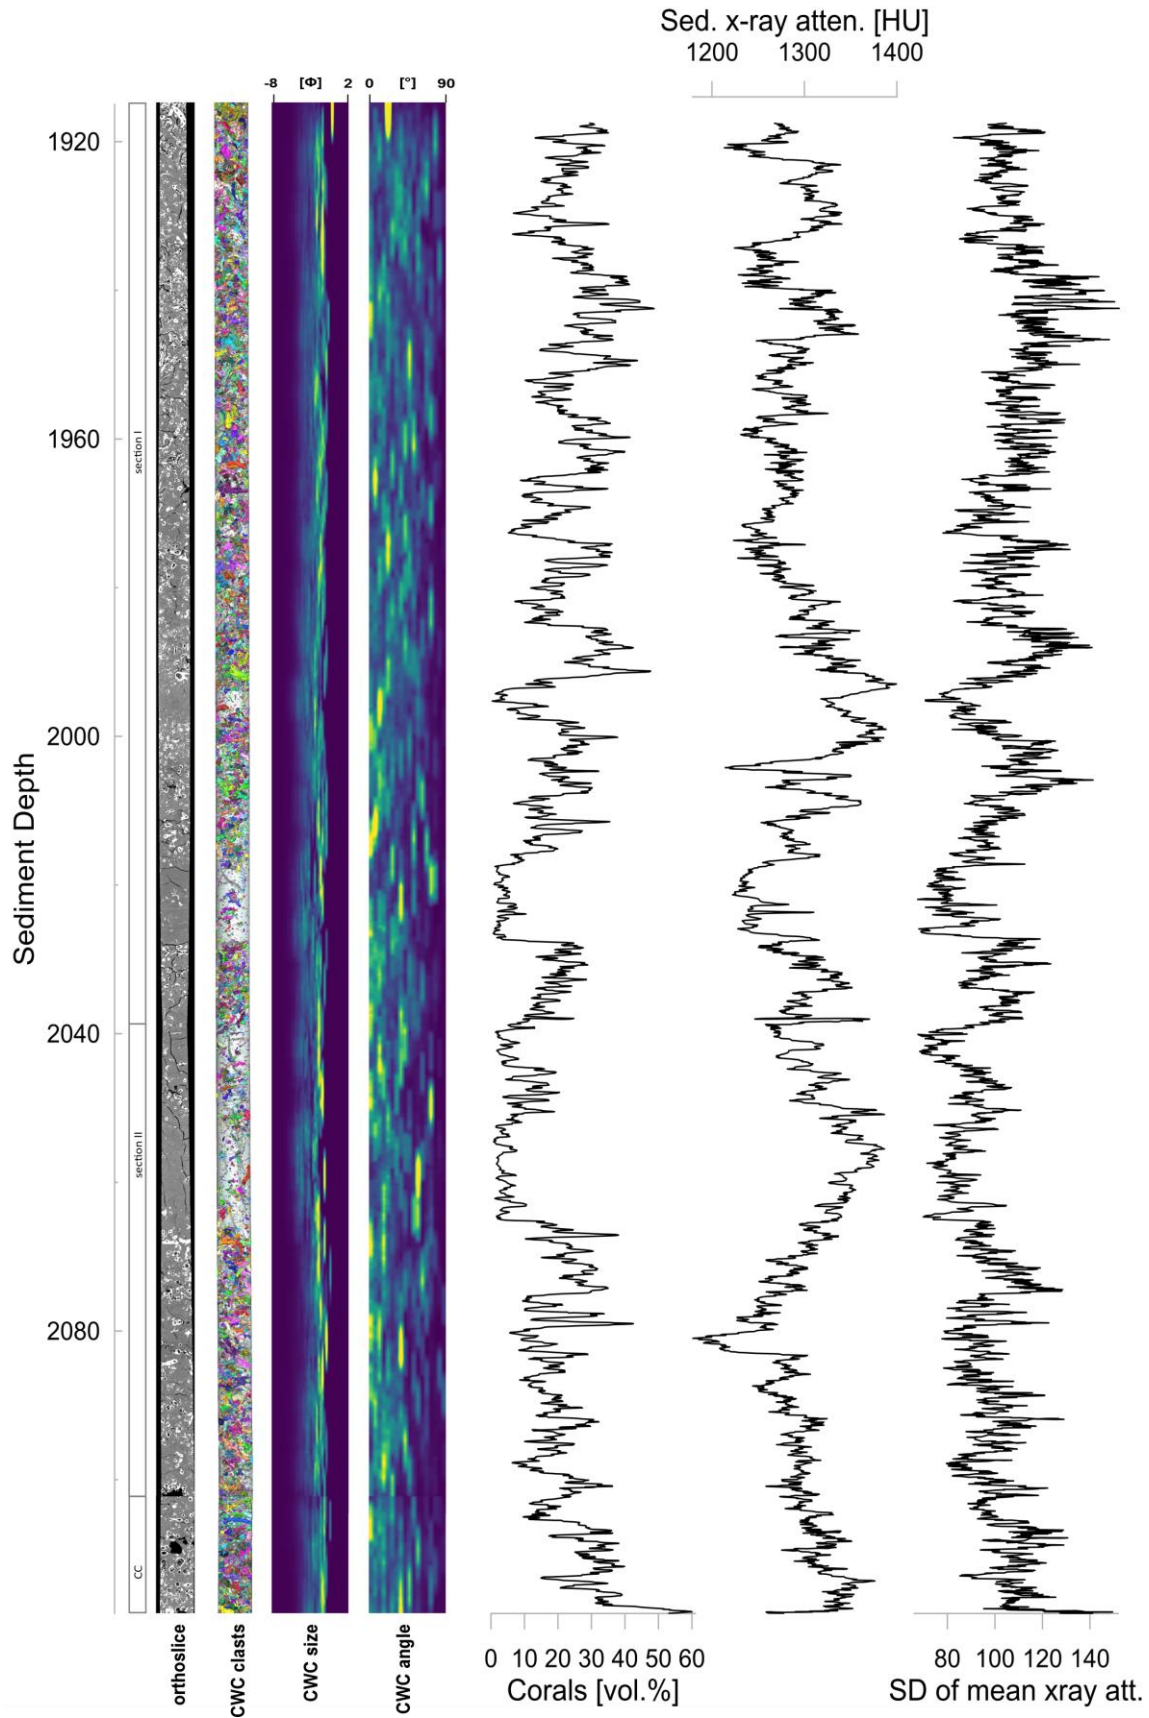

Fig. 17: CT-derived core data for GeoB18116-2 Barrel P9, with Sediment Depth as CSF-A (mbsf), orthoslice, section number (CC = core catcher), cold-water coral fossil clast quantification, size and angle, coral volume and mean x-ray attenuation in HU (Hounsfield units), and SD.

GeoB18116-2 P10

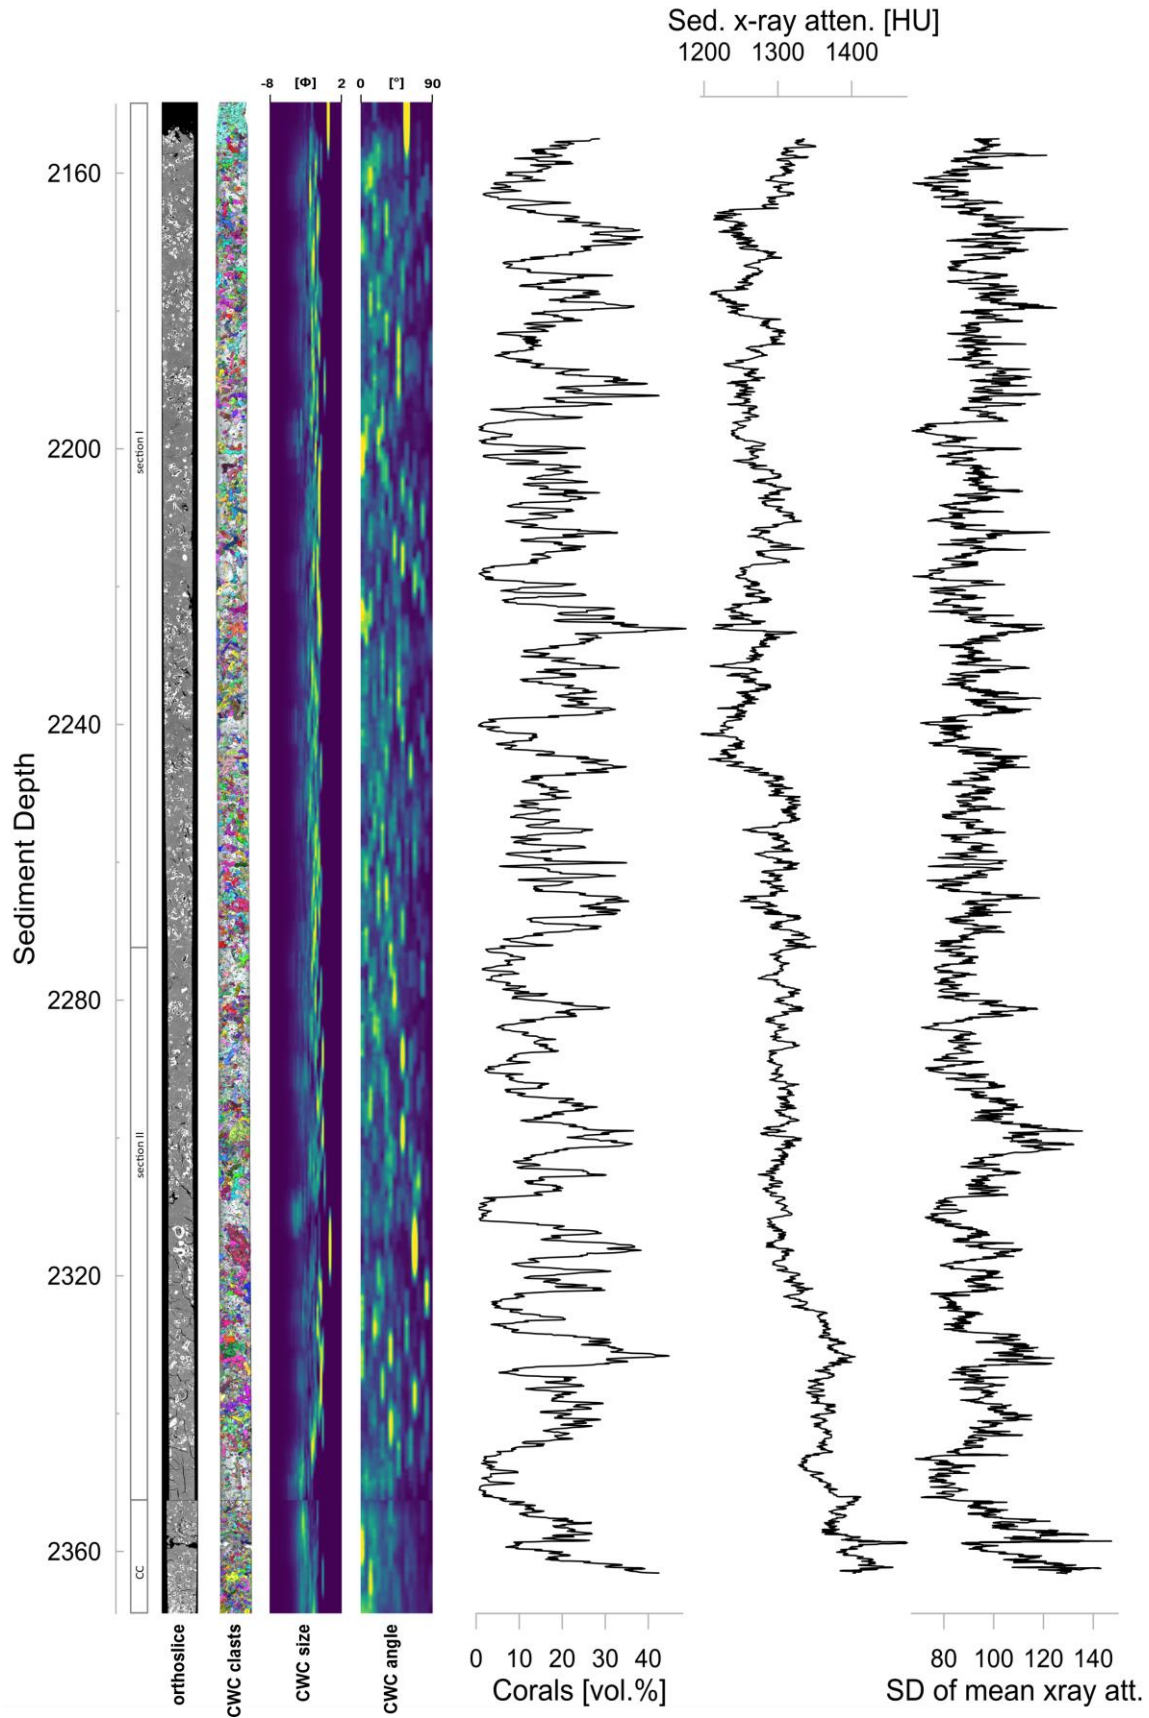

Fig. S18: CT-derived core data for GeoB18116-2 Barrel P10, with Sediment Depth as CSF-A (mbsf), orthoslice, section number (CC = core catcher), cold-water coral fossil clast quantification, size and angle, coral volume and mean x-ray attenuation in HU (Hounsfield units), and SD.

GeoB18116-2 P11

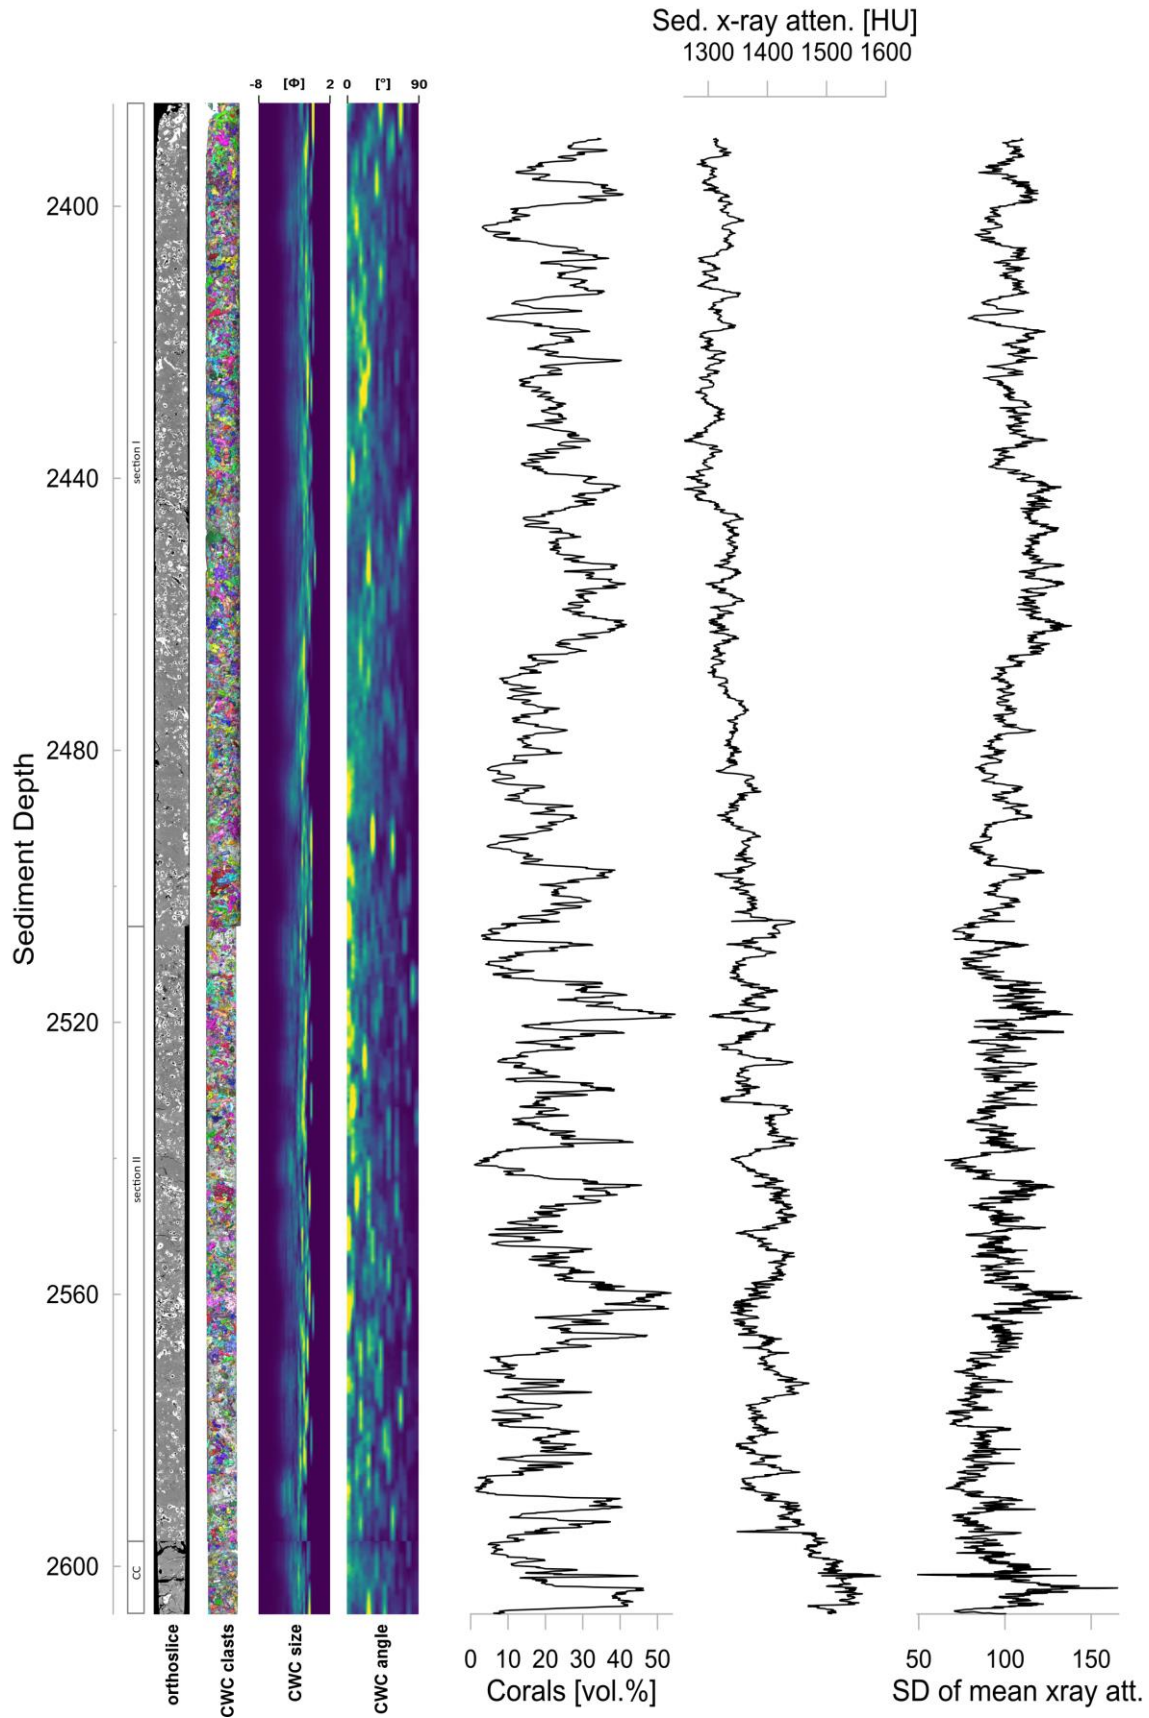

Fig. S19: CT-derived core data for GeoB18116-2 Barrel P11, with Sediment Depth as CSF-A (mbsf), orthoslice, section number (CC = core catcher), cold-water coral fossil clast quantification, size and angle, coral volume and mean x-ray attenuation in HU (Hounsfield units), and SD.

GeoB18116-2 P12

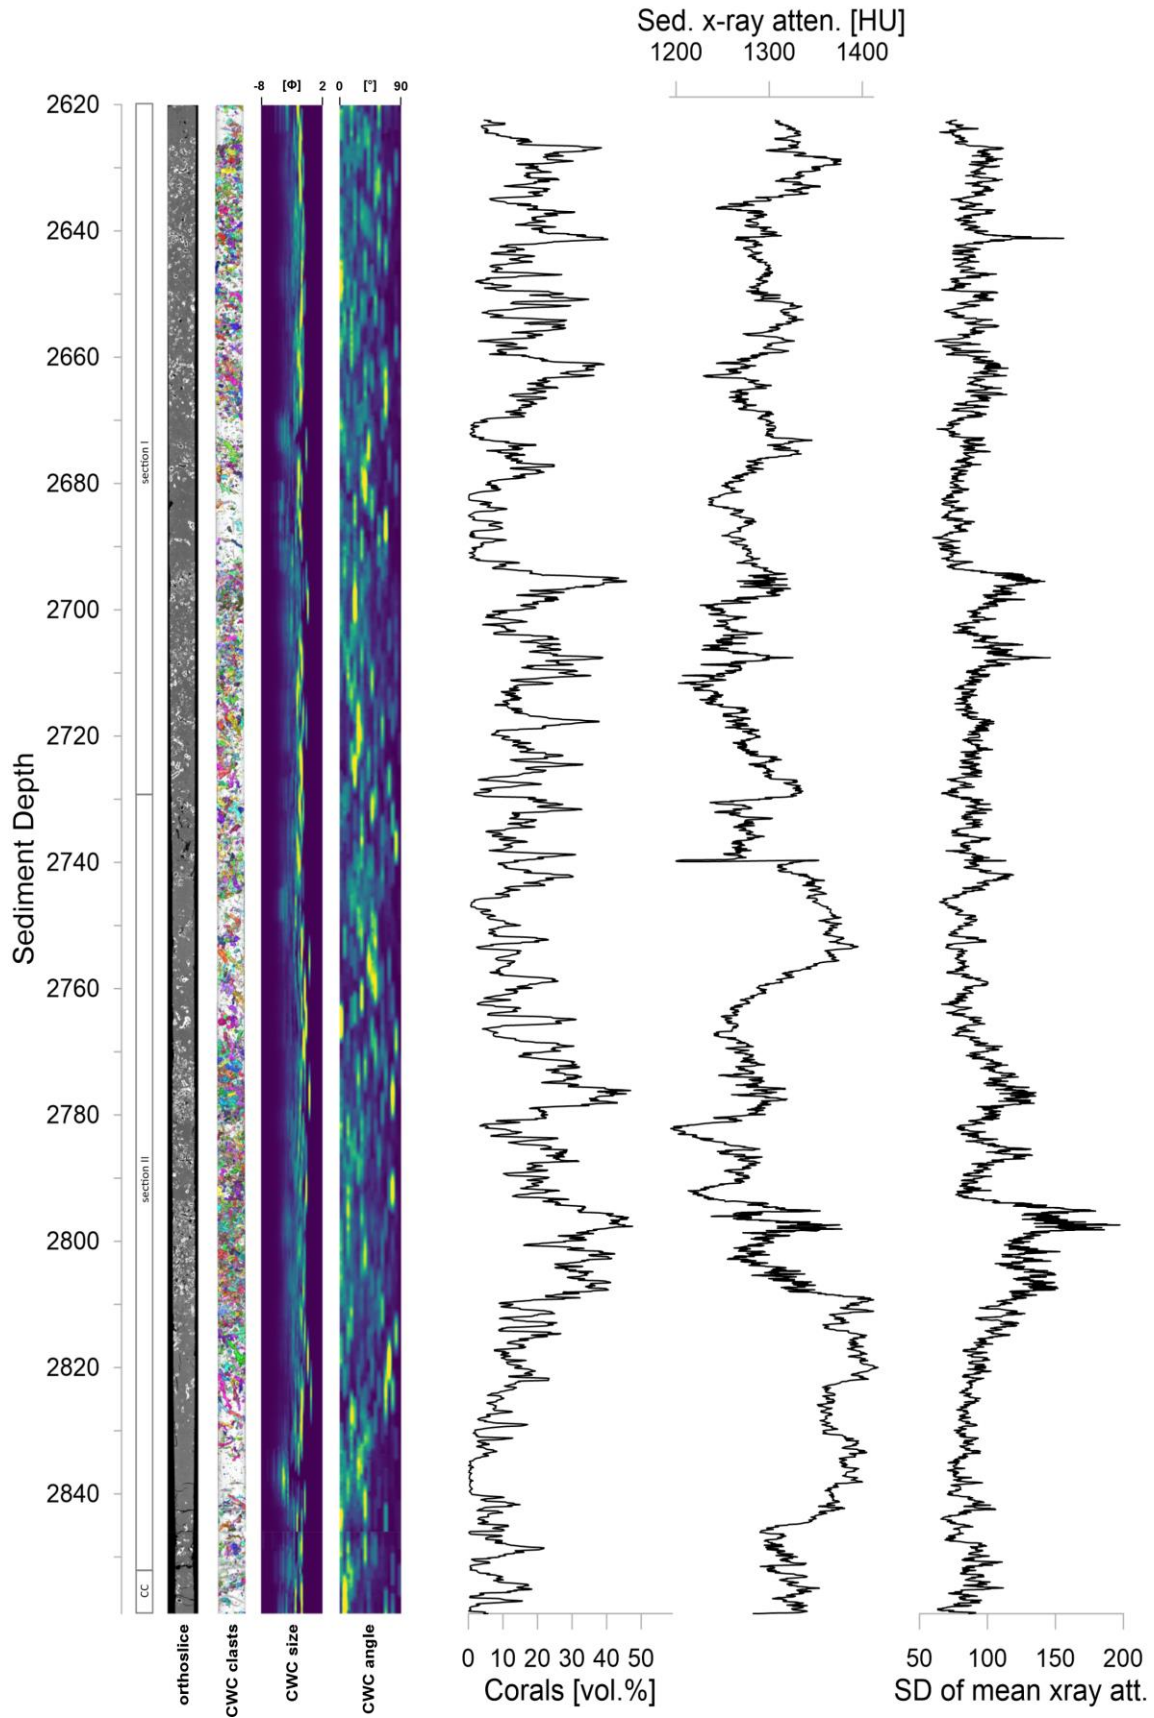

Fig. S20: CT-derived core data for GeoB18116-2 Barrel P12, with Sediment Depth as CSF-A (mbsf), orthoslice, section number (CC = core catcher), cold-water coral fossil clast quantification, size and angle, coral volume and mean x-ray attenuation in HU (Hounsfield units), and SD.

GeoB18116-2 P13

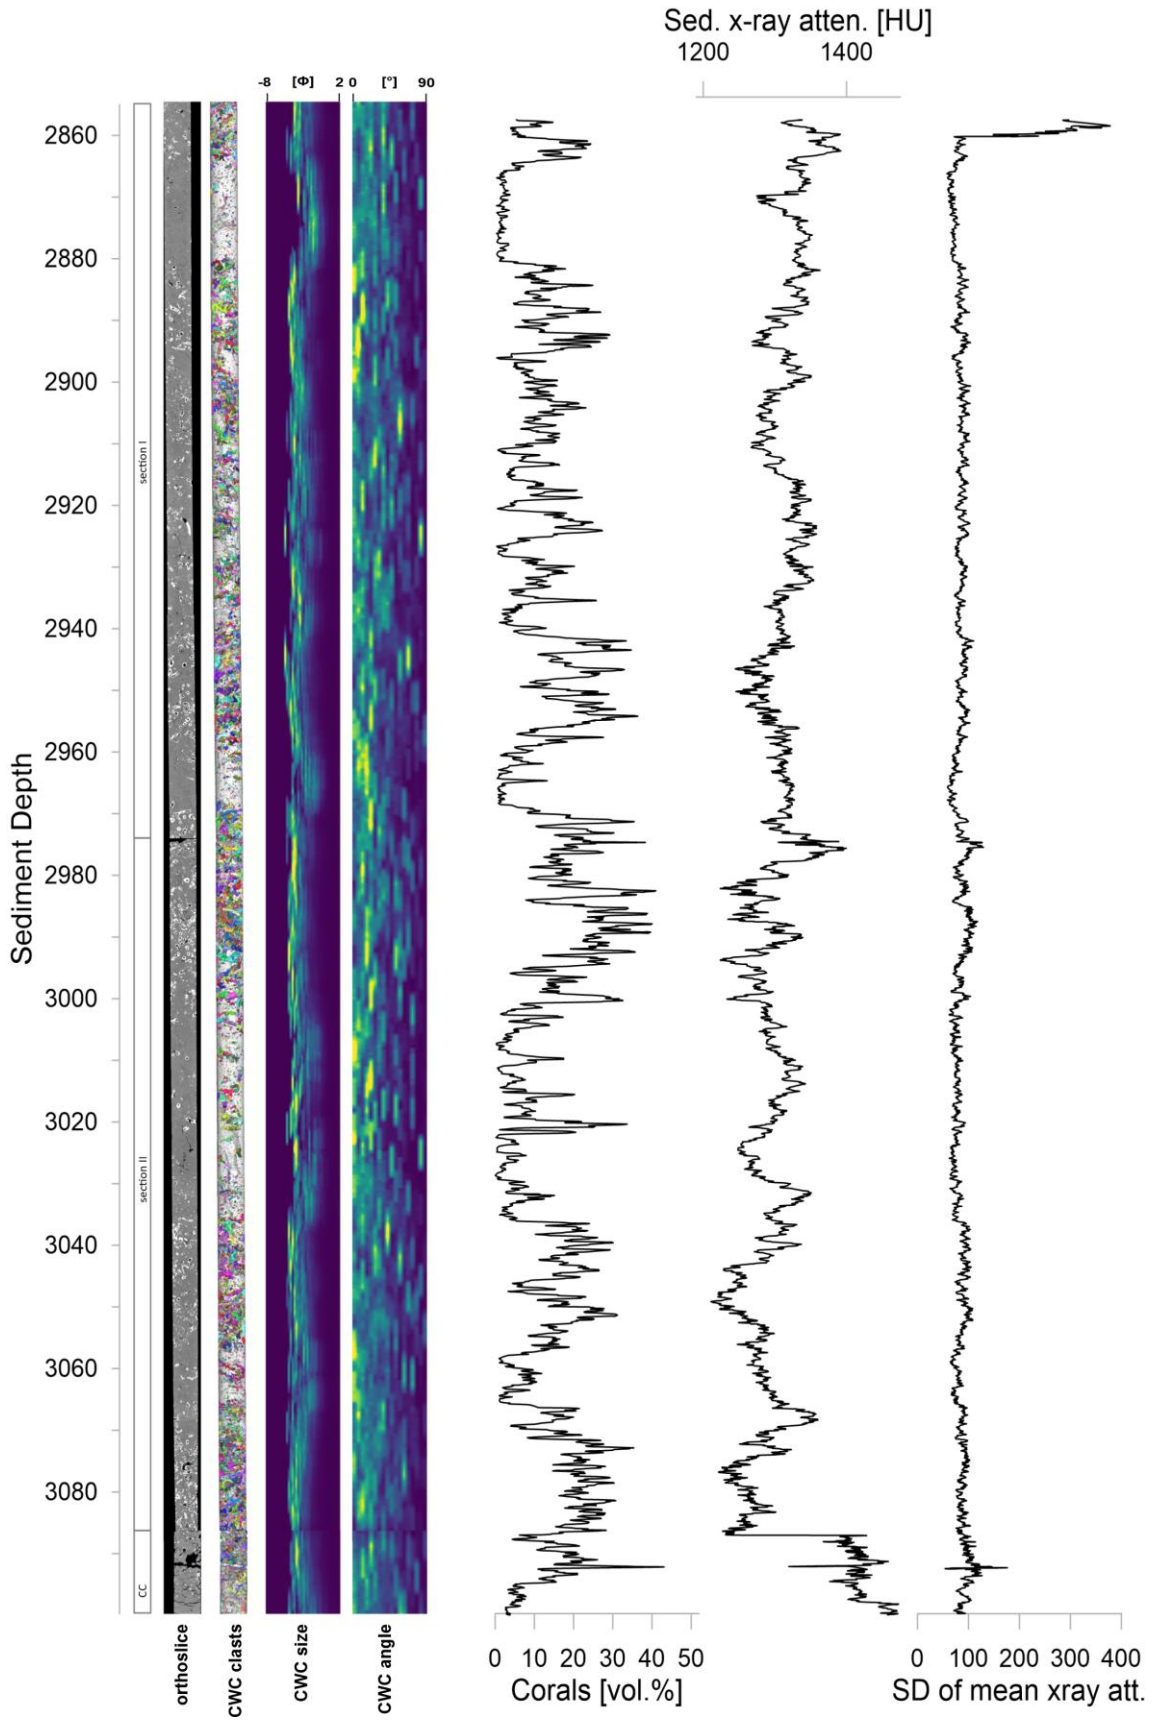

Fig.

S21: CT-derived core data for GeoB18116-2 Barrel P13, with Sediment Depth as CSF-A (mbsf), orthoslice, section number (CC = core catcher), cold-water coral fossil clast quantification, size and angle, coral volume and mean x-ray attenuation in HU (Hounsfield units), and SD.

GeoB18116-2 P14

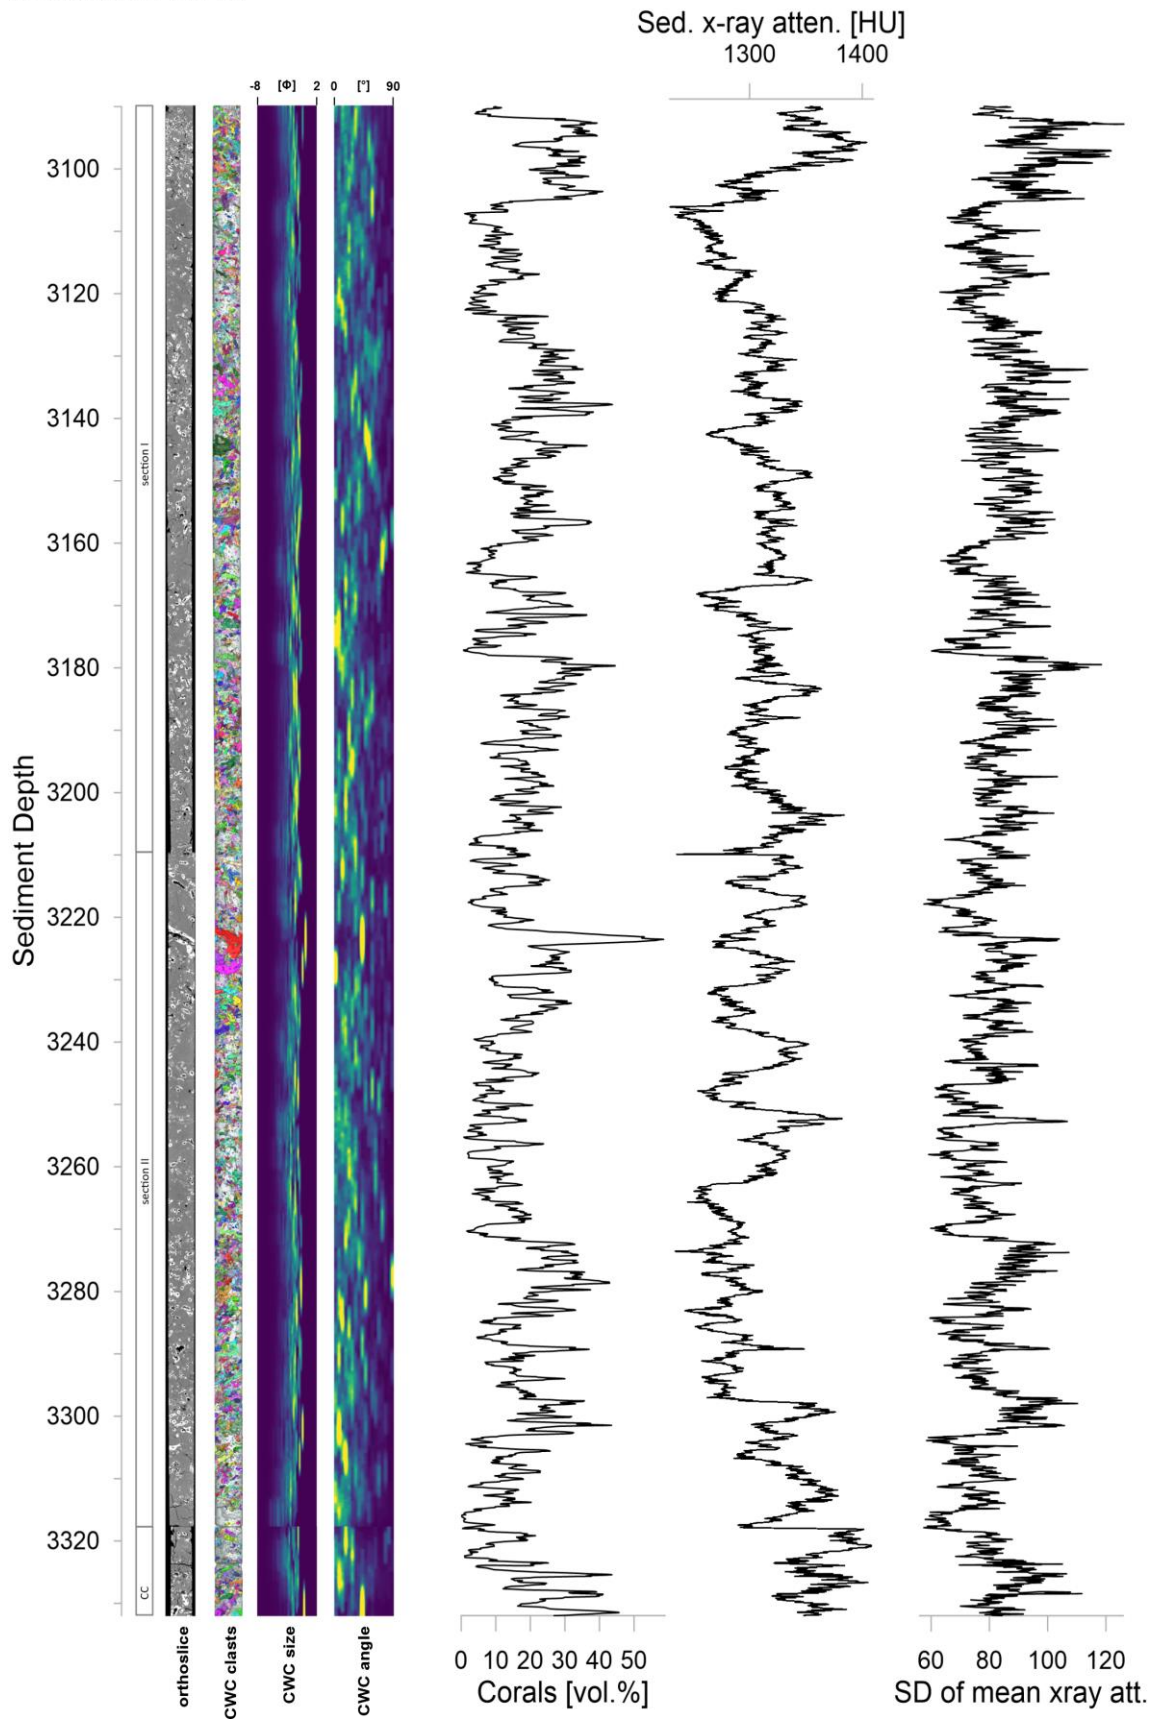

Fig. S22: CT-derived core data for GeoB18116-2 Barrel P14, with Sediment Depth as CSF-A (mbsf), orthoslice, section number (CC = core catcher), cold-water coral fossil clast quantification, size and angle, coral volume and mean x-ray attenuation in HU (Hounsfield units), and SD.

GeoB18116-2 P15

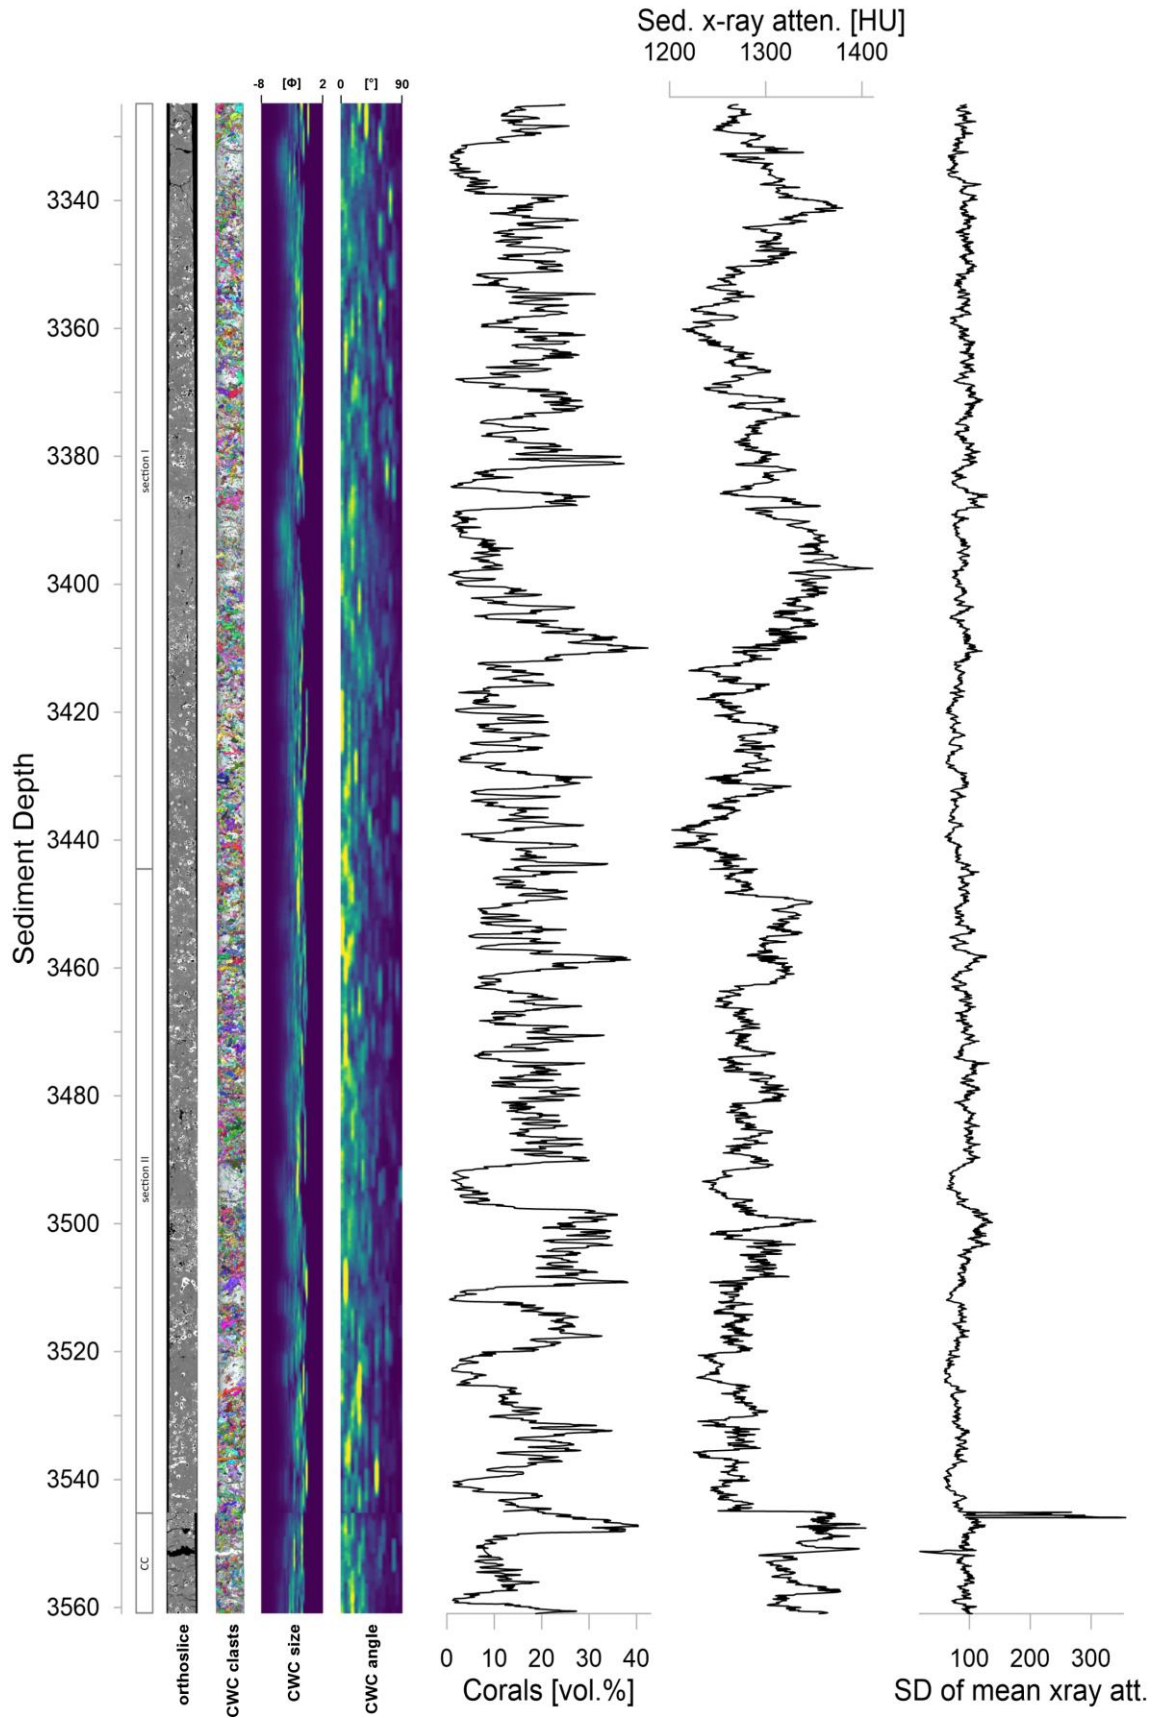

Fig. S23: CT-derived core data for GeoB18116-2 Barrel P15, with Sediment Depth as CSF-A (mbsf), orthoslice, section number (CC = core catcher), cold-water coral fossil clast quantification, size and angle, coral volume and mean x-ray attenuation in HU (Hounsfield units), and SD.



GeoB18116-2 P16

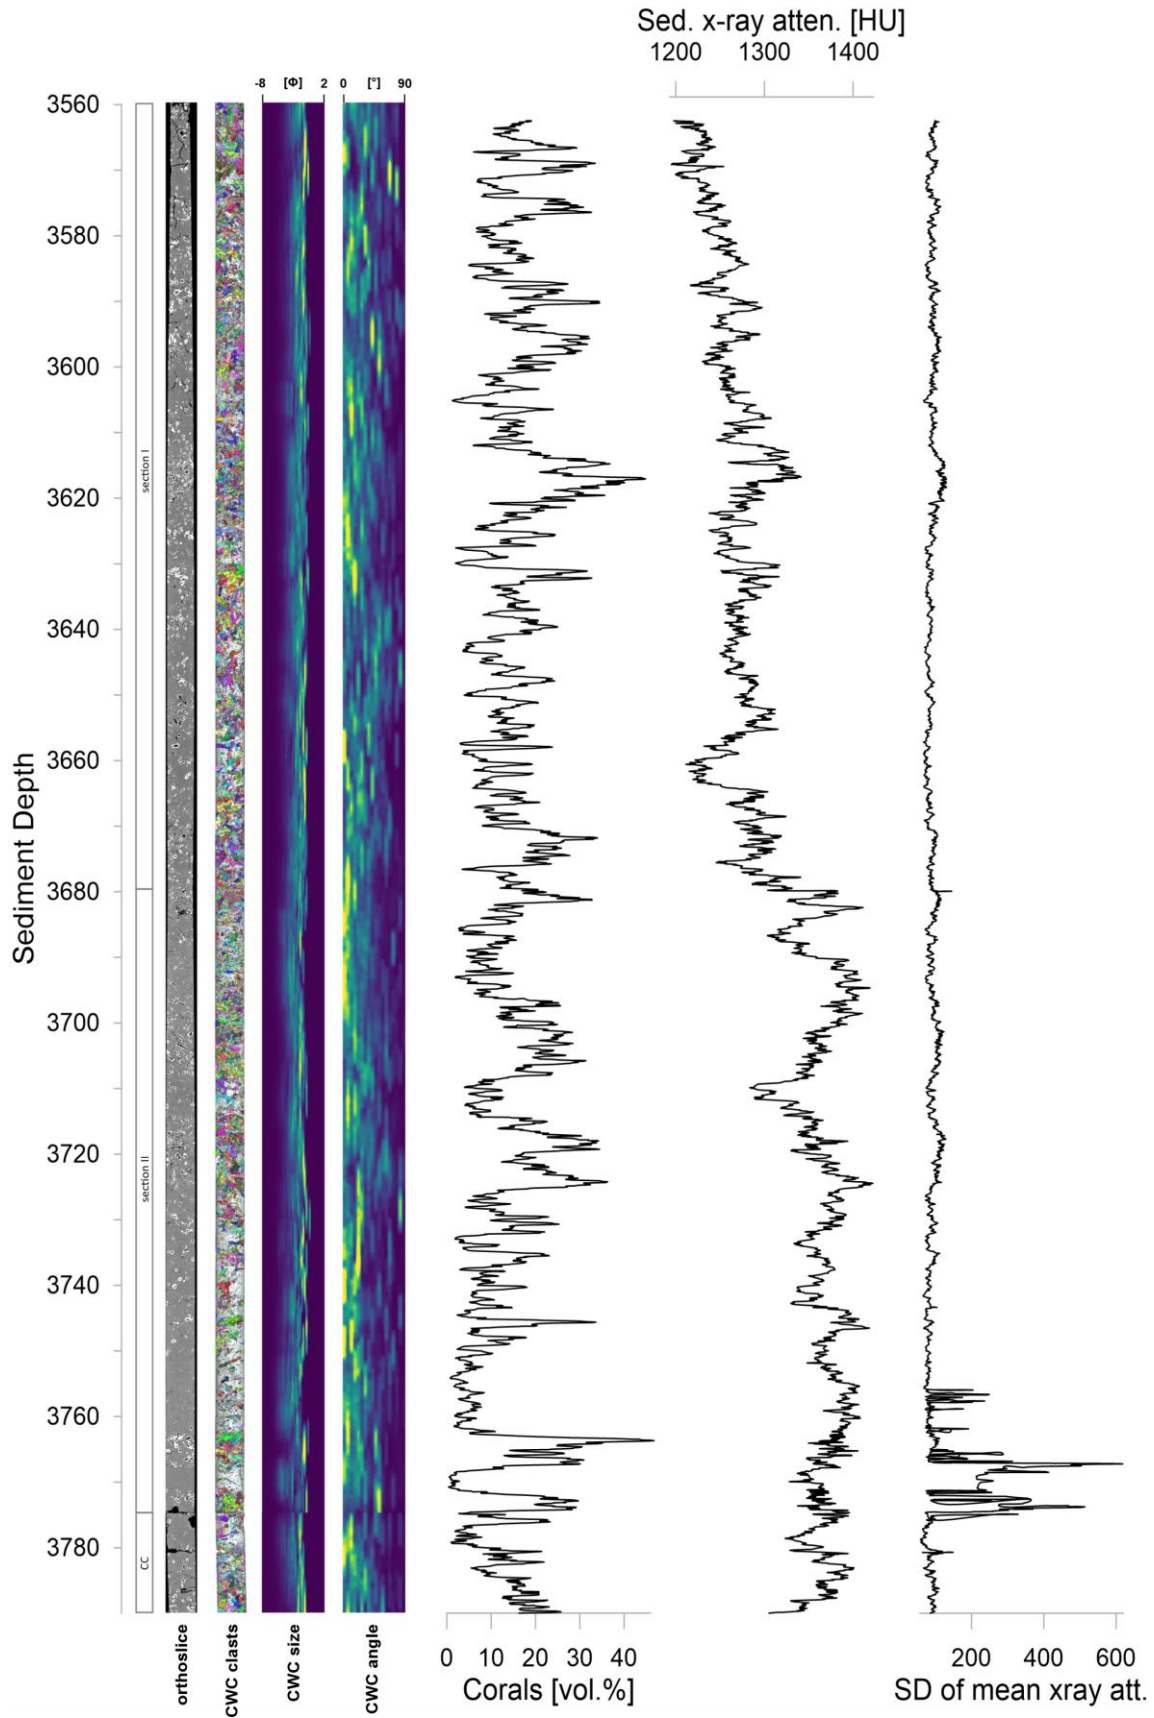

Fig. S24: CT-derived core data for GeoB18116-2 Barrel P16, with Sediment Depth as CSF-A (mbsf), orthoslice, section number (CC = core catcher), cold-water coral fossil clast quantification, size and angle, coral volume and mean x-ray attenuation in HU (Hounsfield units), and SD.

GeoB18116-2 P17

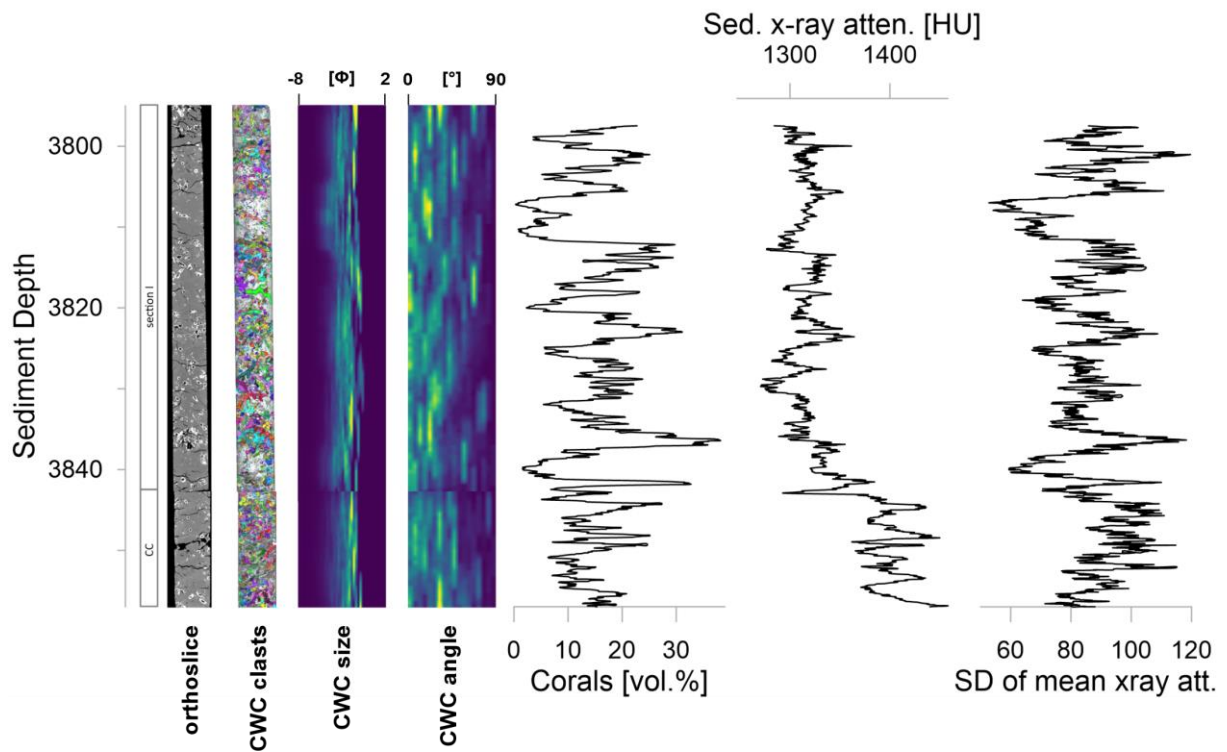

Fig. S25: CT-derived core data for GeoB18116-2 Barrel P17, with Sediment Depth as CSF-A (mbsf), orthoslice, section number (CC = core catcher), cold-water coral fossil clast quantification, size and angle, coral volume and mean x-ray attenuation in HU (Hounsfield units), and SD.

GeoB18116-2 P18

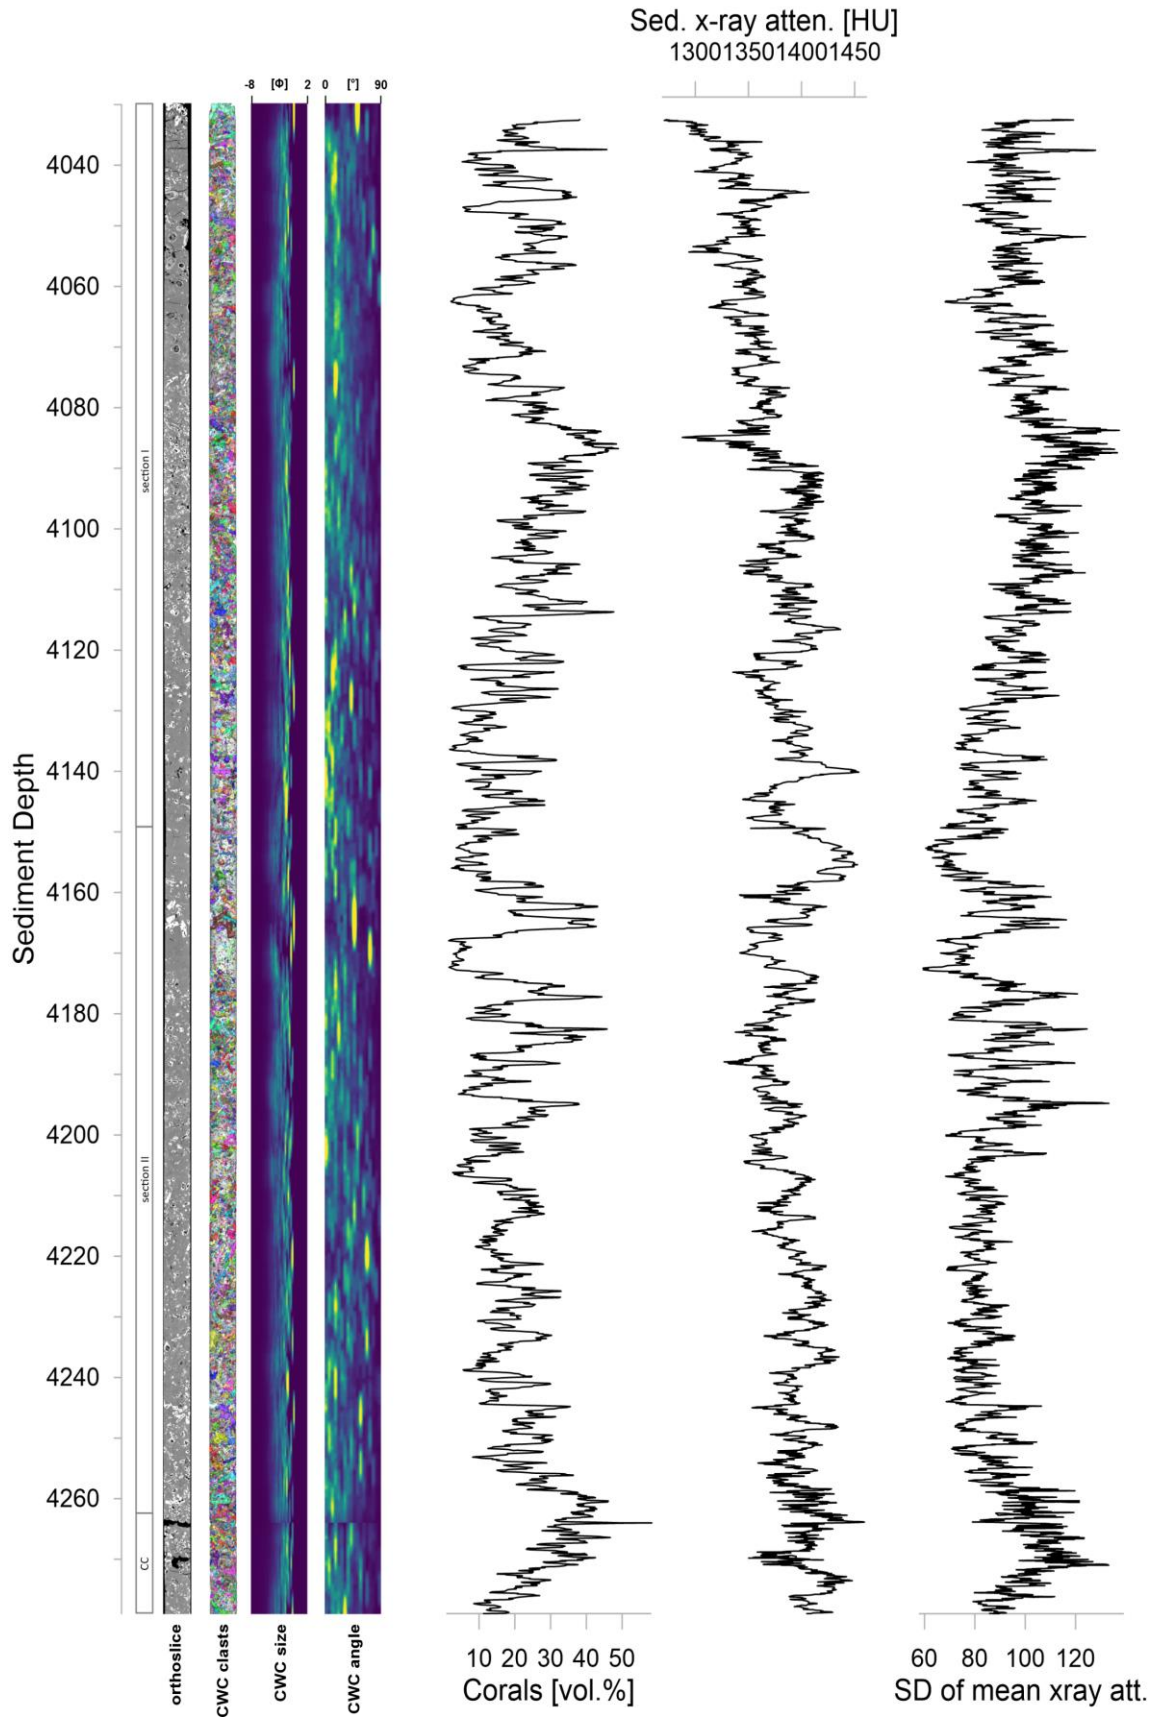

Fig. S26: CT-derived core data for GeoB18116-2 Barrel P18, with Sediment Depth as CSF-A (mbsf), orthoslice, section number (CC = core catcher), cold-water coral fossil clast quantification, size and angle, coral volume and mean x-ray attenuation in HU (Hounsfield units), and SD.

GeoB18116-2 P19

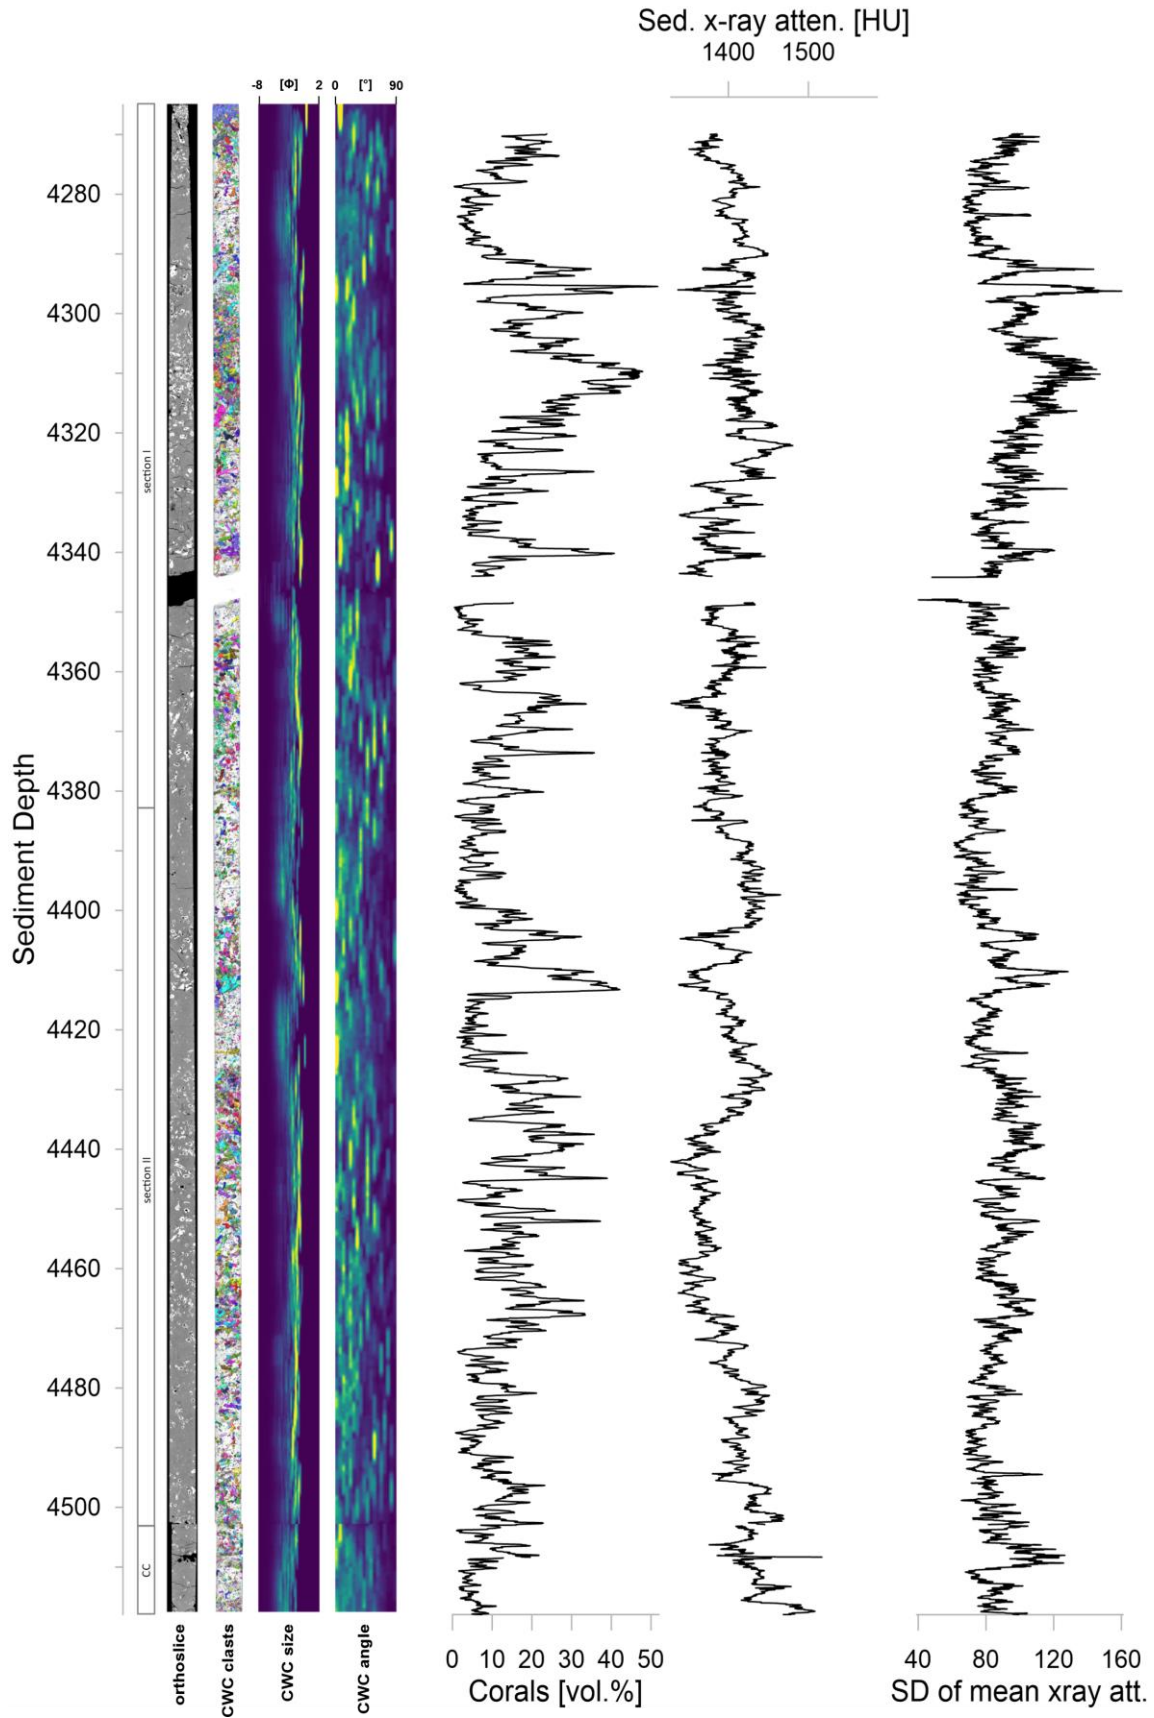

Fig. S27: CT-derived core data for GeoB18116-2 Barrel P19, with Sediment Depth as CSF-A (mbsf), orthoslice, section number (CC = core catcher), cold-water coral fossil clast quantification, size and angle, coral volume and mean x-ray attenuation in HU (Hounsfield units), and SD.

GeoB18116-2 P20

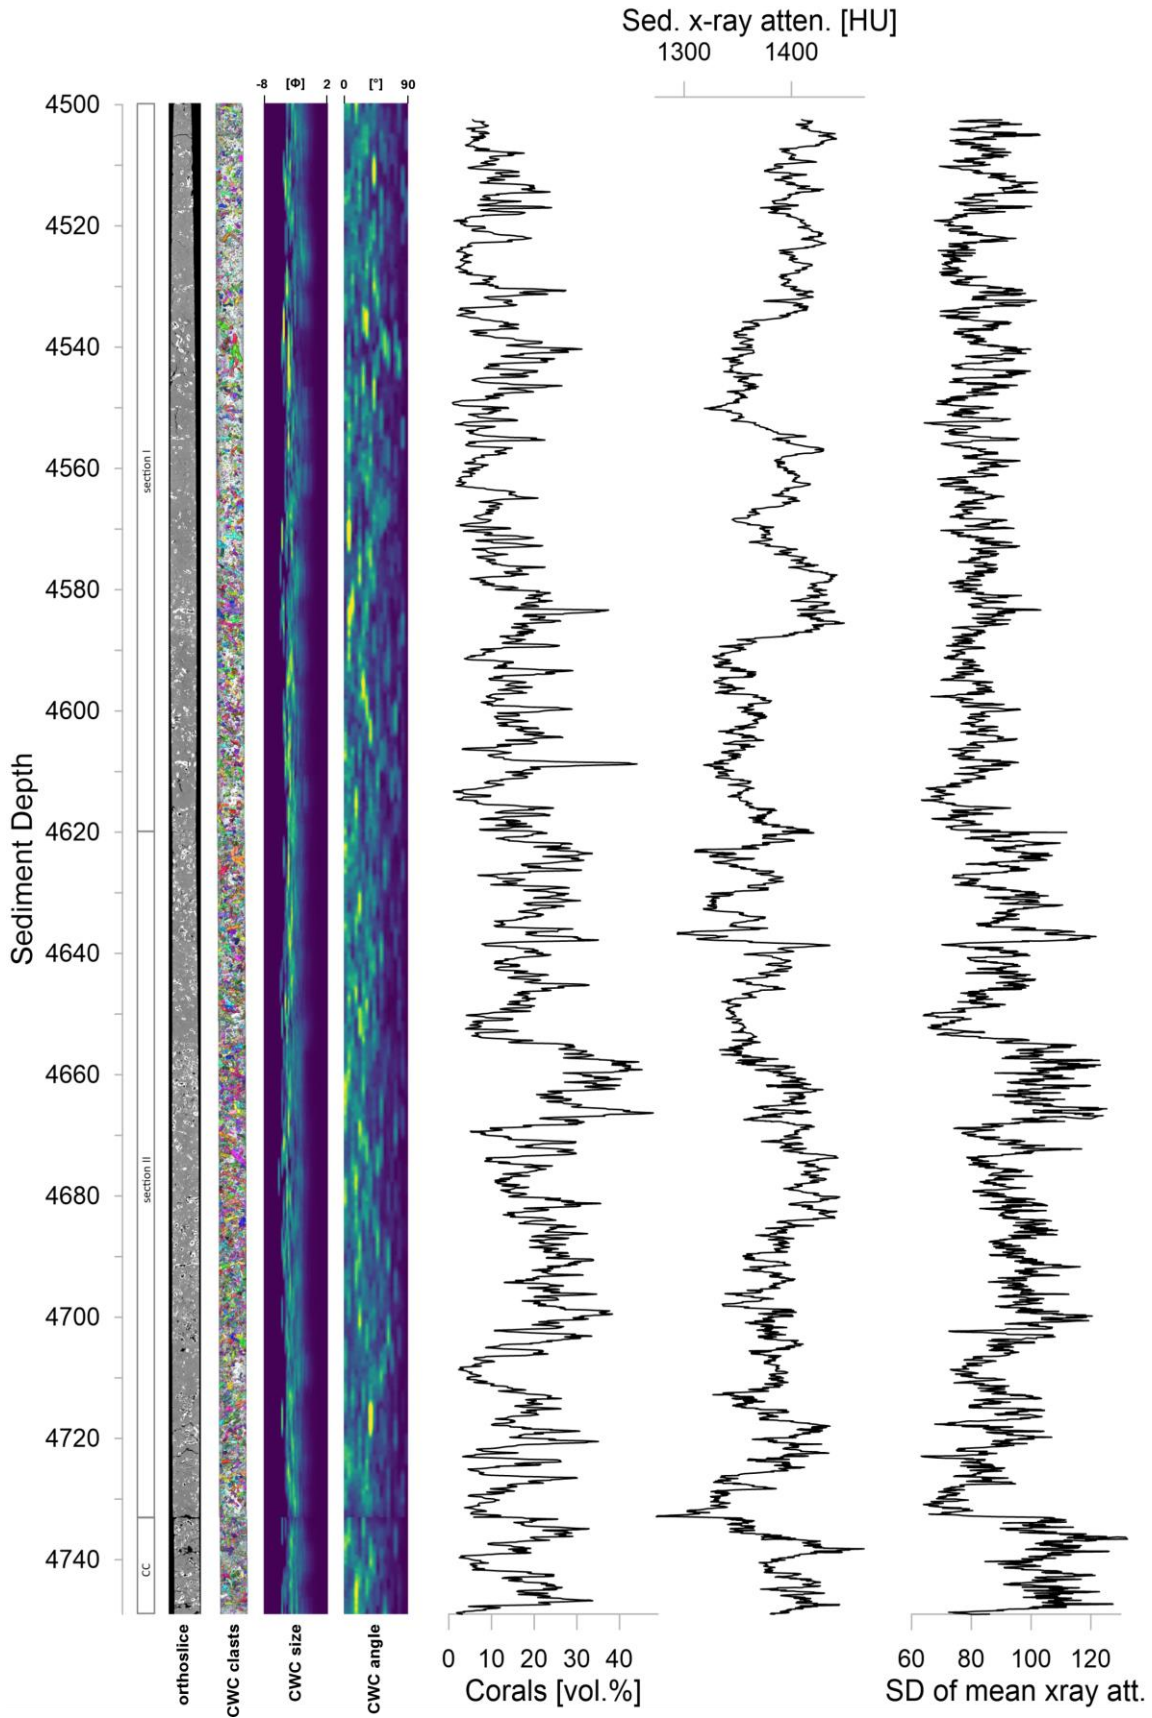

Fig. S28: CT-derived core data for GeoB18116-2 Barrel P20, with Sediment Depth as CSF-A (mbsf), orthoslice, section number (CC = core catcher), cold-water coral fossil clast quantification, size and angle, coral volume and mean x-ray attenuation in HU (Hounsfield units), and SD.

GeoB18116-2 P21

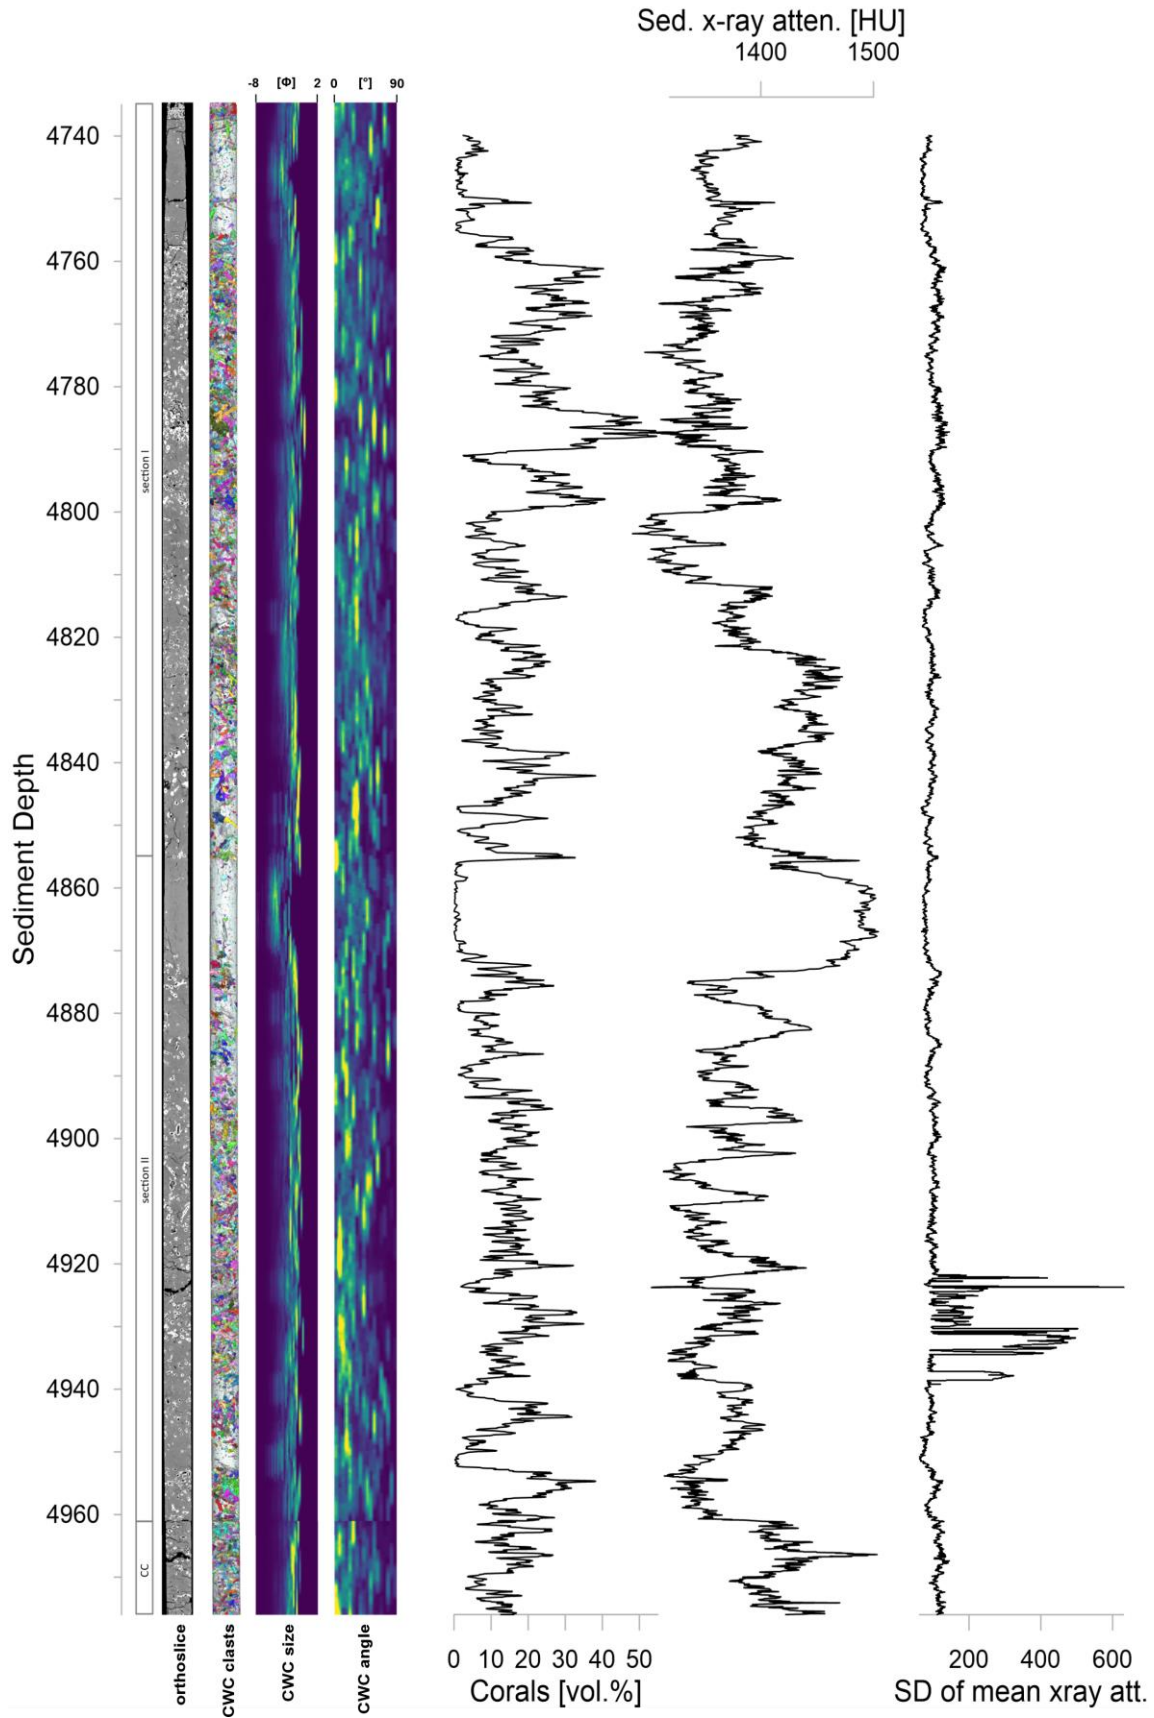

Fig. S29: CT-derived core data for GeoB18116-2 Barrel P21, with Sediment Depth as CSF-A (mbsf), orthoslice, section number (CC = core catcher), cold-water coral fossil clast quantification, size and angle, coral volume and mean x-ray attenuation in HU (Hounsfield units), and SD.

GeoB18116-2 P22

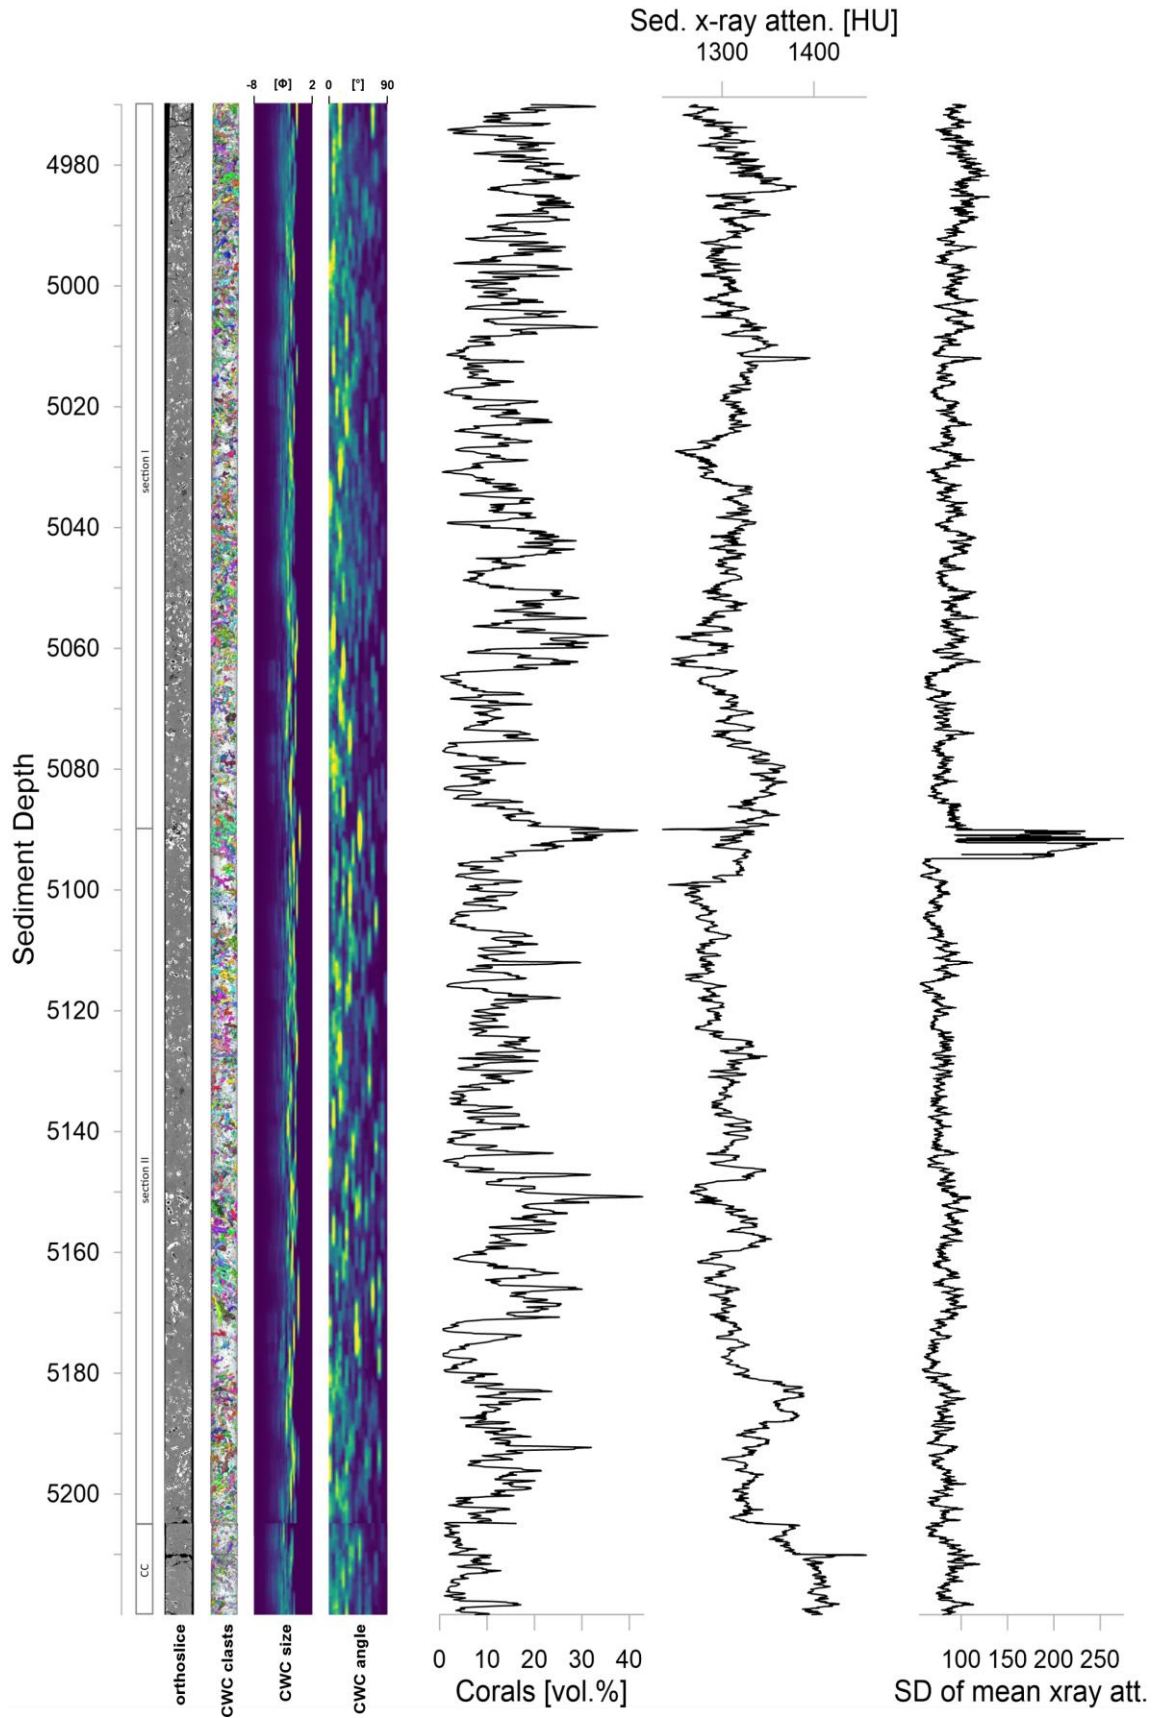

Fig. S30: CT-derived core data for GeoB18116-2 Barrel P22, with Sediment Depth as CSF-A (mbsf), orthoslice, section number (CC = core catcher), cold-water coral fossil clast quantification, size and angle, coral volume and mean x-ray attenuation in HU (Hounsfield units), and SD.

GeoB18116-2 P23

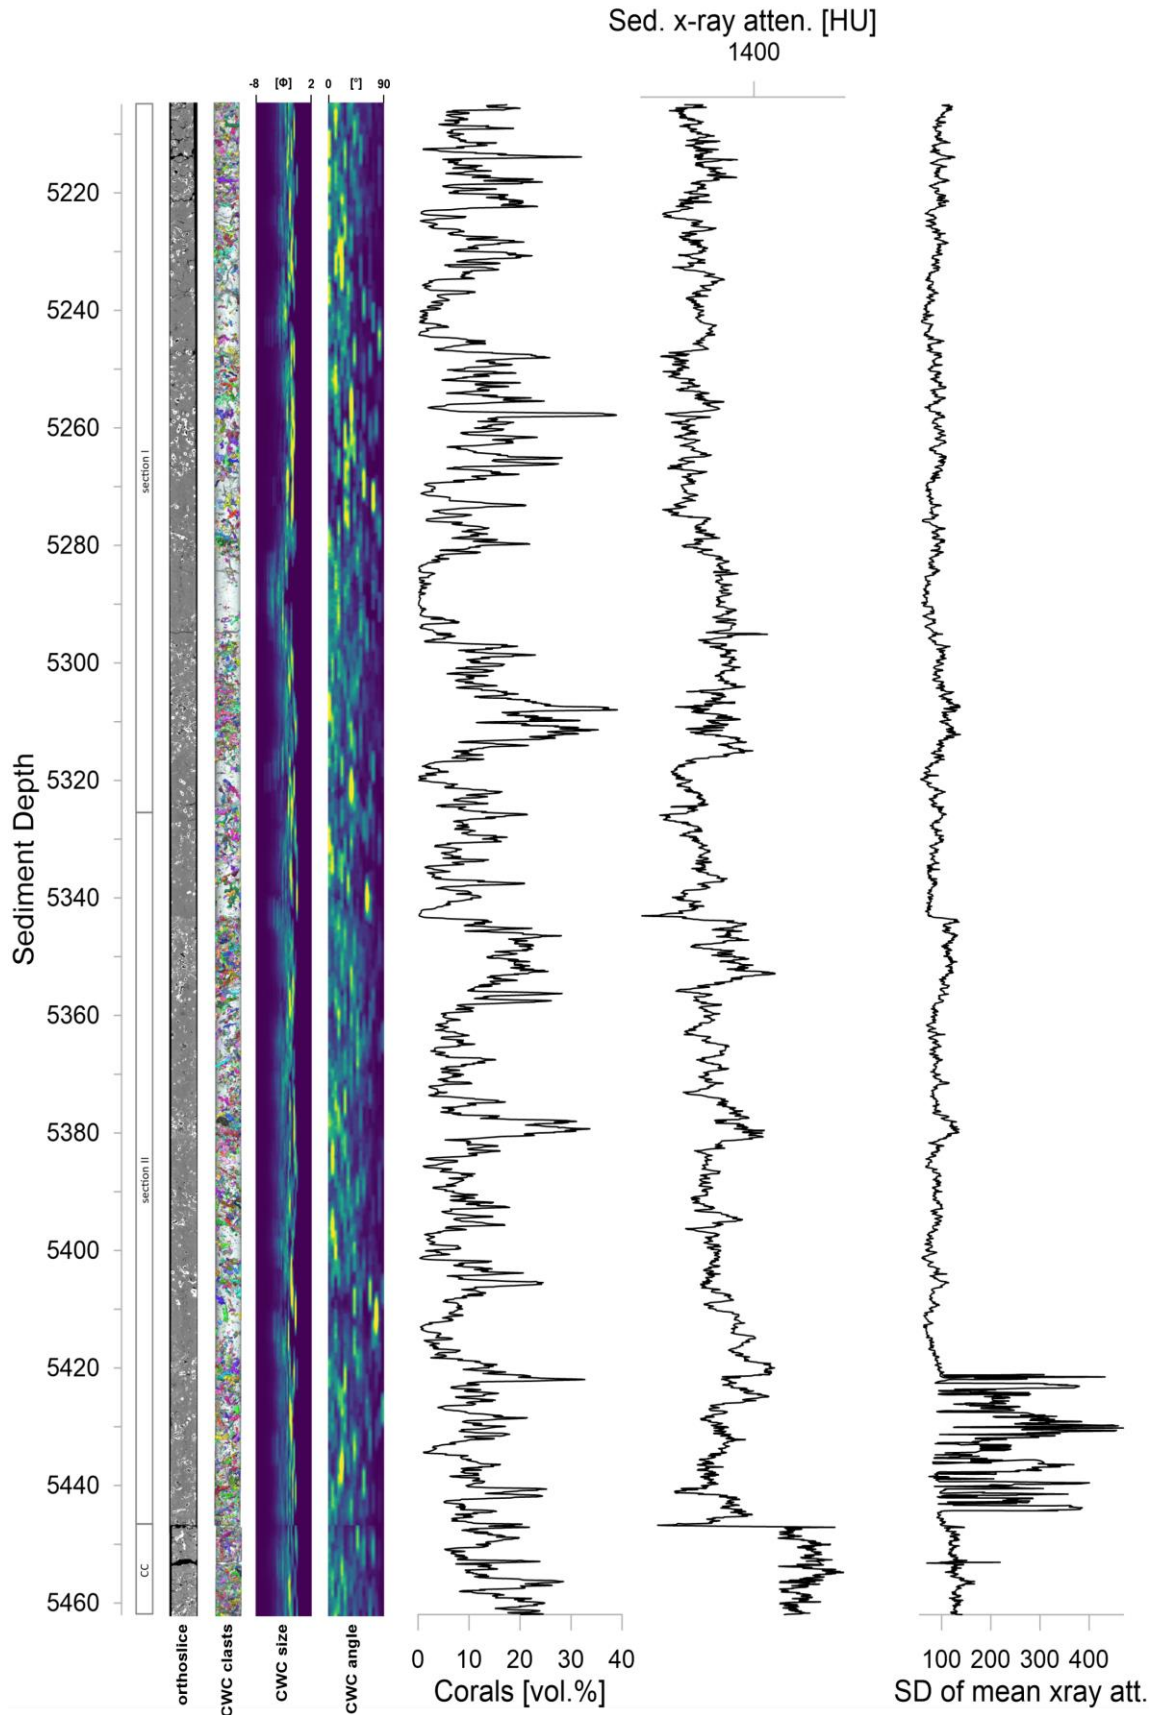

Fig. S31: CT-derived core data for GeoB18116-2 Barrel P23, with Sediment Depth as CSF-A (mbsf), orthoslice, section number (CC = core catcher), cold-water coral fossil clast quantification, size and angle, coral volume and mean x-ray attenuation in HU (Hounsfield units), and SD.



GeoB18116-2 P24

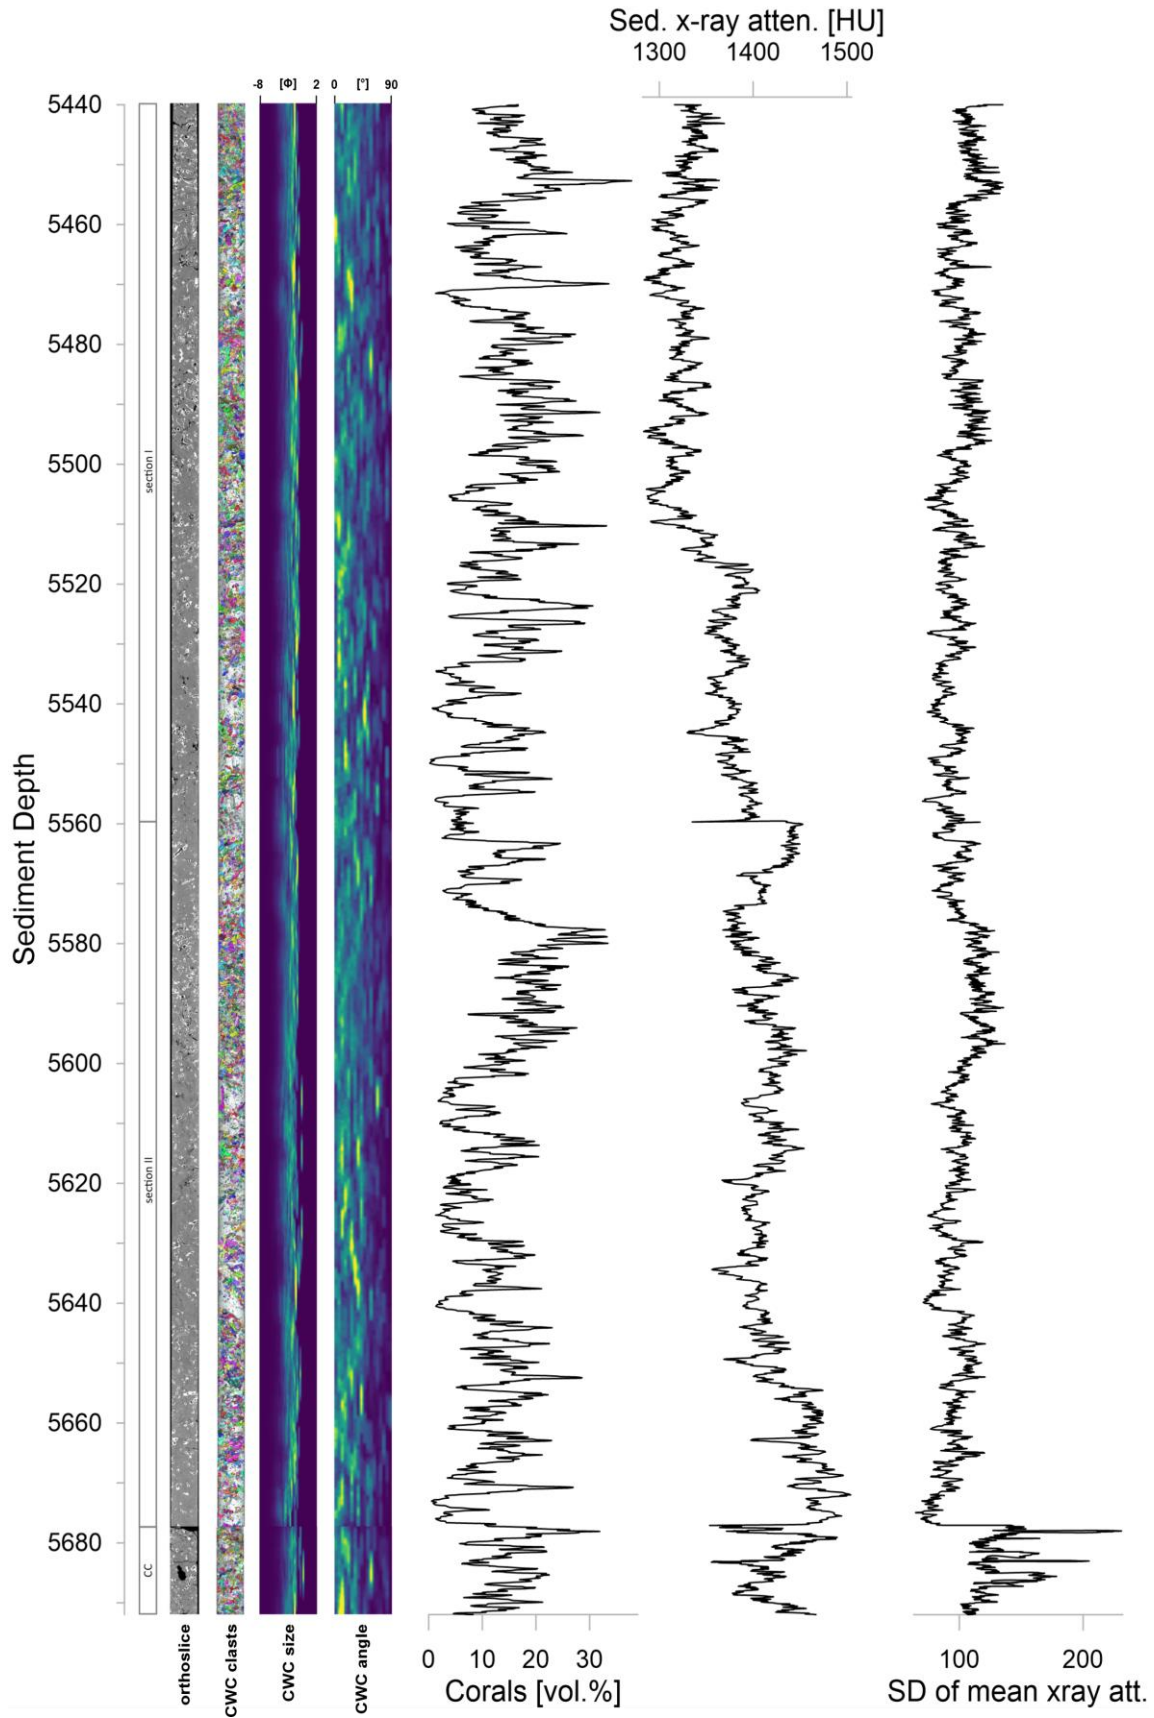

Fig. S32: CT-derived core data for GeoB18116-2 Barrel P24, with Sediment Depth as CSF-A (mbsf), orthoslice, section number (CC = core catcher), cold-water coral fossil clast quantification, size and angle, coral volume and mean x-ray attenuation in HU (Hounsfield units), and SD.

GeoB18116-2 P25

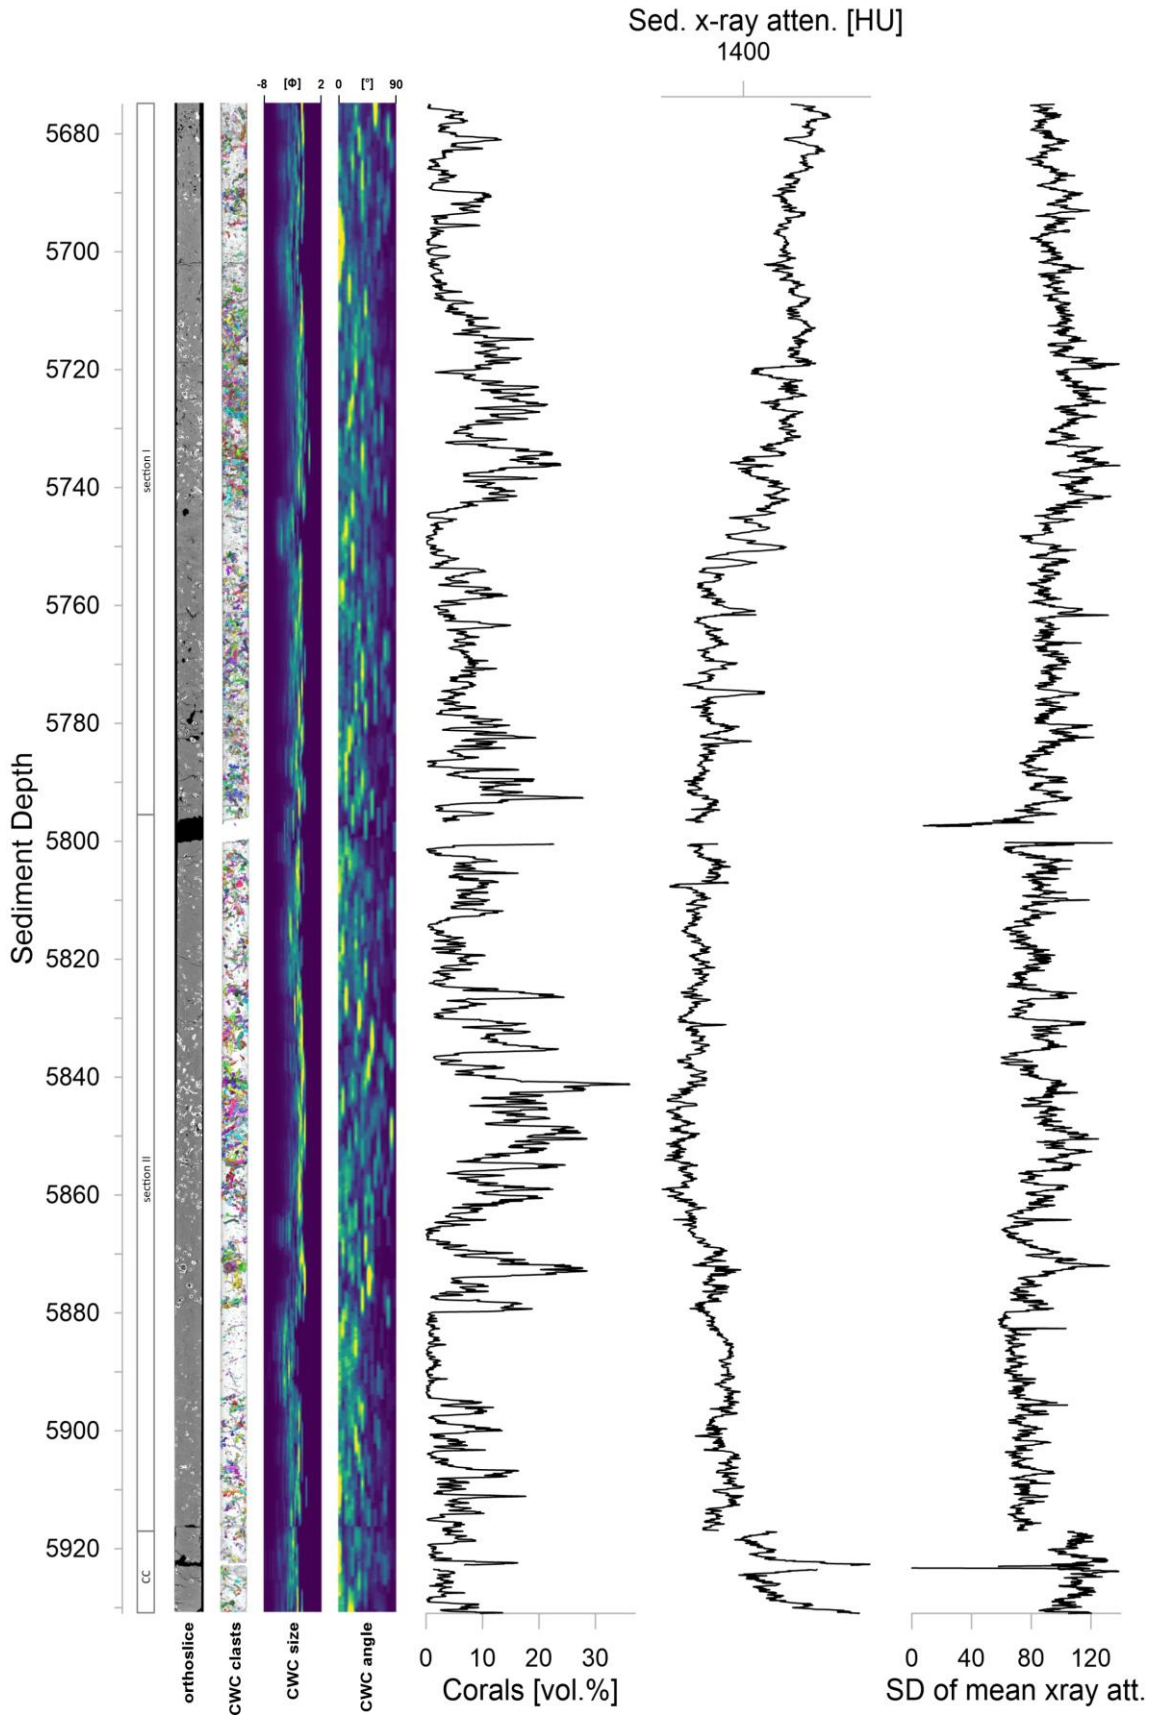

Fig. S33: CT-derived core data for GeoB18116-2 Barrel P25, with Sediment Depth as CSF-A (mbsf), orthoslice, section number (CC = core catcher), cold-water coral fossil clast quantification, size and angle, coral volume and mean x-ray attenuation in HU (Hounsfield units), and SD.

GeoB18116-2 P26

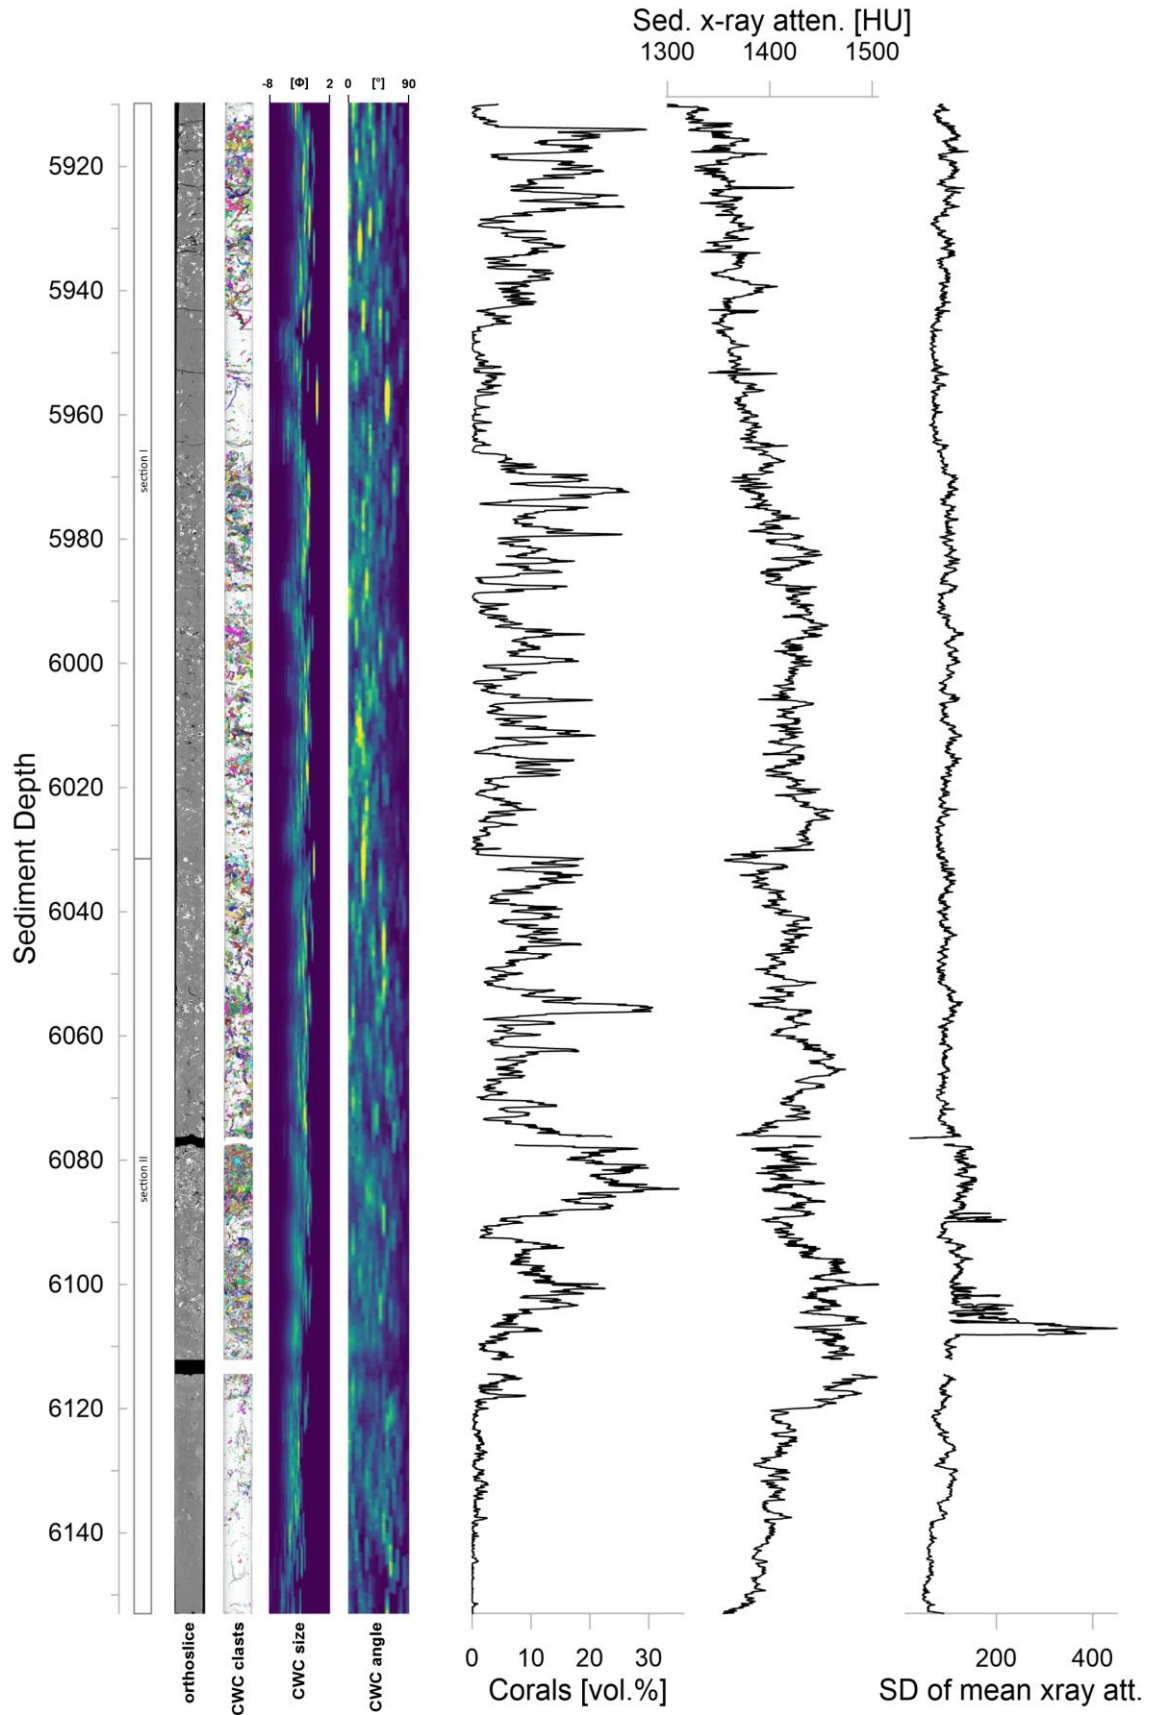

Fig. S34: CT-derived core data for GeoB18116-2 Barrel P26, with Sediment Depth as CSF-A (mbsf), orthoslice, section number (CC = core catcher), cold-water coral fossil clast quantification, size and angle, coral volume and mean x-ray attenuation in HU (Hounsfield units), and SD.
